# Supplementary material for: Drimane-type sesquiterpenoids and triterpenoids from the whole plant of Limonium sinense with their antiproliferative and anti-inflammatory activities
Source: Royal Society of Chemistry journal article supplement (doi:10.1039/d4ra06721e), 2025-01-01
Supplement: d4ra06721e1.pdf [file d4ra06721e1.pdf]

## Supplemental Information

### Supplemental Information List

- Fig S1**  $^1\text{H}$ -NMR spectrum of compound **1** (DMSO- $d_6$ , 600 MHz)
- Fig S2**  $^{13}\text{C}$ -NMR spectrum of compound **1** (DMSO- $d_6$ , 150 MHz)
- Fig S3** HSQC spectrum of compound **1** (DMSO- $d_6$ )
- Fig S4** HMBC spectrum of compound **1** (DMSO- $d_6$ )
- Fig S5** NOESY spectrum of compound **1** (DMSO- $d_6$ )
- Fig S6** HRESIMS spectrum of compound **1** (MeOH)
- Fig S7**  $^1\text{H}$ -NMR spectrum of compound **2** (DMSO- $d_6$ , 600 MHz)
- Fig S8**  $^{13}\text{C}$ -NMR spectrum of compound **2** (DMSO- $d_6$ , 150 MHz)
- Fig S9** HSQC spectrum of compound **2** (DMSO- $d_6$ )
- Fig S10** HMBC spectrum of compound **2** (DMSO- $d_6$ )
- Fig S11** NOESY spectrum of compound **2** (DMSO- $d_6$ )
- Fig S12** HRESIMS spectrum of compound **2** (MeOH)
- Fig S13**  $^1\text{H}$ -NMR spectrum of compound **3** (DMSO- $d_6$ , 600 MHz)
- Fig S14**  $^{13}\text{C}$ -NMR spectrum of compound **3** (DMSO- $d_6$ , 150 MHz)
- Fig S15** HSQC spectrum of compound **3** (DMSO- $d_6$ )
- Fig S16** HMBC spectrum of compound **3** (DMSO- $d_6$ )
- Fig S17** NOESY spectrum of compound **3** (DMSO- $d_6$ )
- Fig S18** HRESIMS spectrum of compound **3** (MeOH)
- Fig S19**  $^1\text{H}$ -NMR spectrum of compound **4** (DMSO- $d_6$ , 600 MHz)
- Fig S20**  $^{13}\text{C}$ -NMR spectrum of compound **4** (DMSO- $d_6$ , 150 MHz)
- Fig S21** HSQC spectrum of compound **4** (DMSO- $d_6$ )
- Fig S22** HMBC spectrum of compound **4** (DMSO- $d_6$ )
- Fig S13** NOESY spectrum of compound **4** (DMSO- $d_6$ )
- Fig S24** HRESIMS spectrum of compound **4** (MeOH)
- Fig S25**  $^1\text{H}$ -NMR spectrum of compound **5** (DMSO- $d_6$ , 600 MHz)
- Fig S26**  $^{13}\text{C}$ -NMR spectrum of compound **5** (DMSO- $d_6$ , 150 MHz)
- Fig S27** HSQC spectrum of compound **5** (DMSO- $d_6$ )

**Fig S28** HMBC spectrum of compound **5** (DMSO- $d_6$ )

**Fig S29** NOESY spectrum of compound **5** (DMSO- $d_6$ )

**Fig S30** HRESIMS spectrum of compound **5** (MeOH)

**Fig S31**  $^1\text{H}$ -NMR spectrum of compound **6** (DMSO- $d_6$ , 600 MHz)

**Fig S32**  $^{13}\text{C}$ -NMR spectrum of compound **6** (DMSO- $d_6$ , 150 MHz)

**Fig S33** HSQC spectrum of compound **6** (DMSO- $d_6$ )

**Fig S34** HMBC spectrum of compound **6** (DMSO- $d_6$ )

**Fig S35** HRESIMS spectrum of compound **6** (MeOH)

**Fig S36** TIC scan of positive ion mode.

**Fig S37** TIC scan of negative ion mode

**Table S1** Qualitative study of chemical constituents (terpenes are marked in red ) in *L. sinense*

**Fig S38** The HPLC-MS/MS spectrum of 3-acetylphenanthren

**Fig S39** The HPLC-MS/MS spectrum of (+)-nootkatone

**Fig S40** The HPLC-MS/MS spectrum of 7 $\alpha$ -hydroxy-3-desoxyzaluzanin C

**Fig S41** The HPLC-MS/MS spectrum of dehydrocostus lactone

**Fig S42** The HPLC-MS/MS spectrum of costunolide

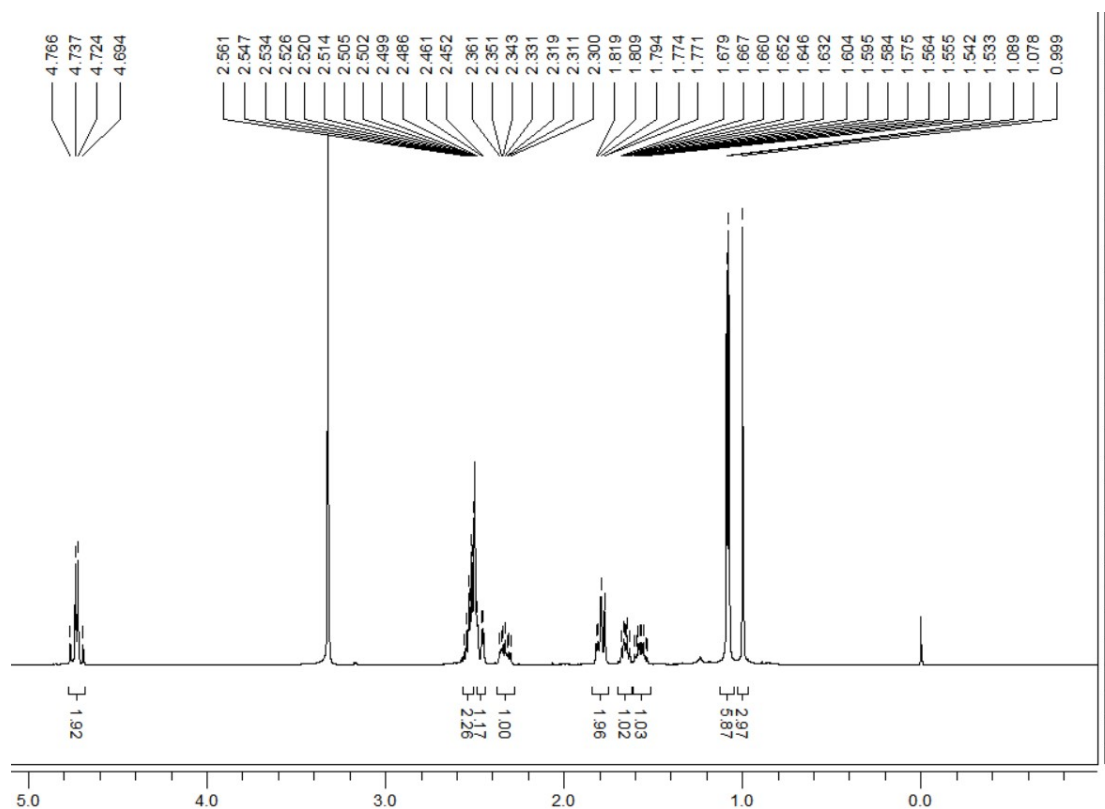

**Fig S1**  $^1\text{H}$ -NMR spectrum of compound **1** ( $\text{DMSO-}d_6$ , 600 MHz)

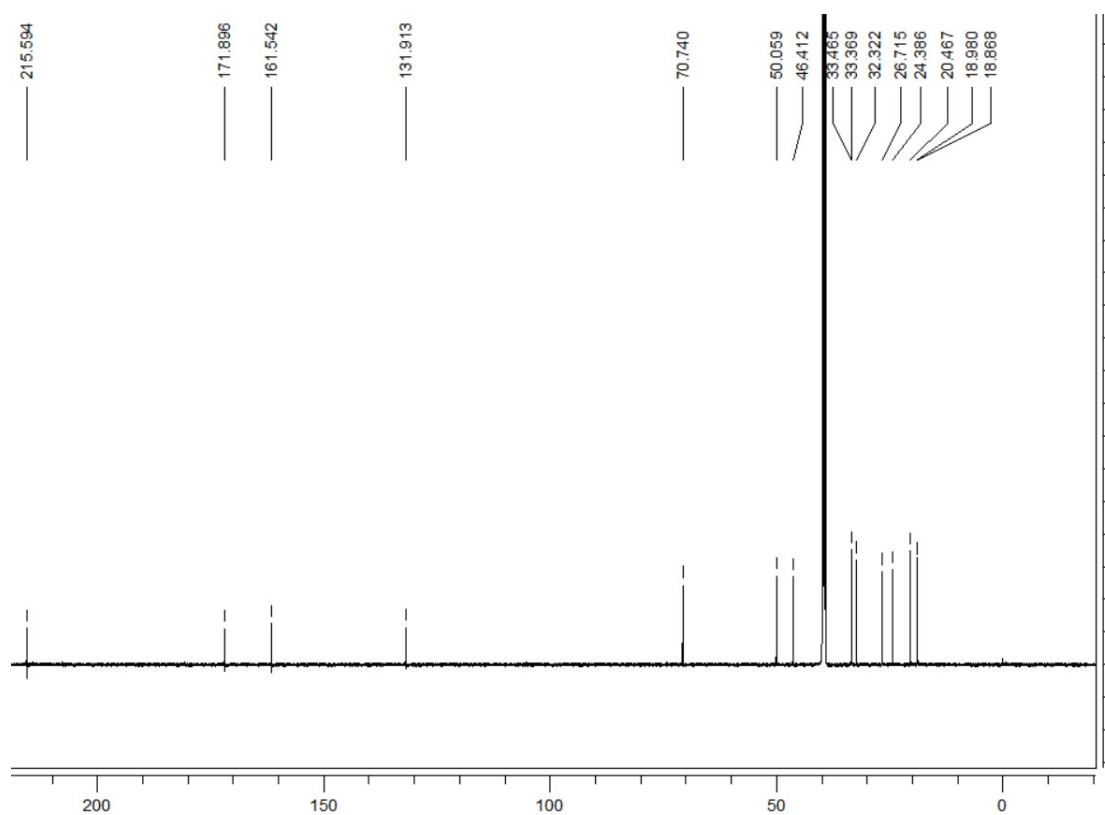

**Fig S2**  $^{13}\text{C}$ -NMR spectrum of compound **1** ( $\text{DMSO-}d_6$ , 150 MHz)

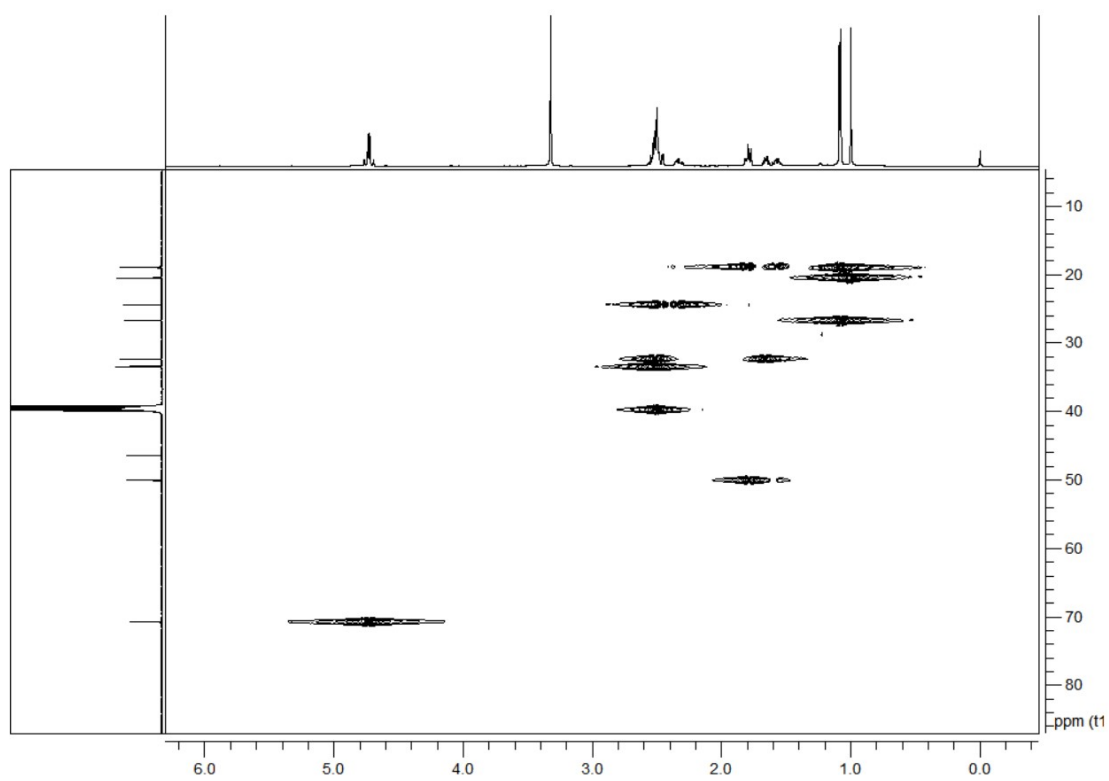

**Fig S3** HSQC spectrum of compound **1** (DMSO- $d_6$ )

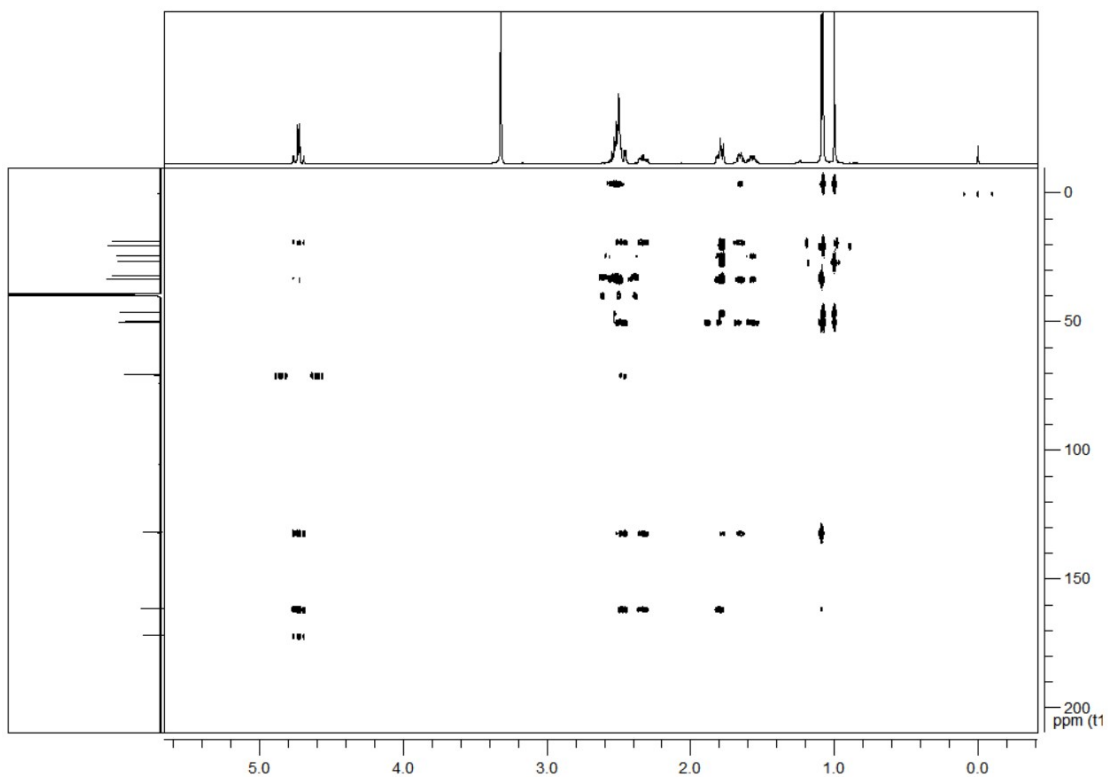

**Fig S4** HMBC spectrum of compound **1** (DMSO- $d_6$ )

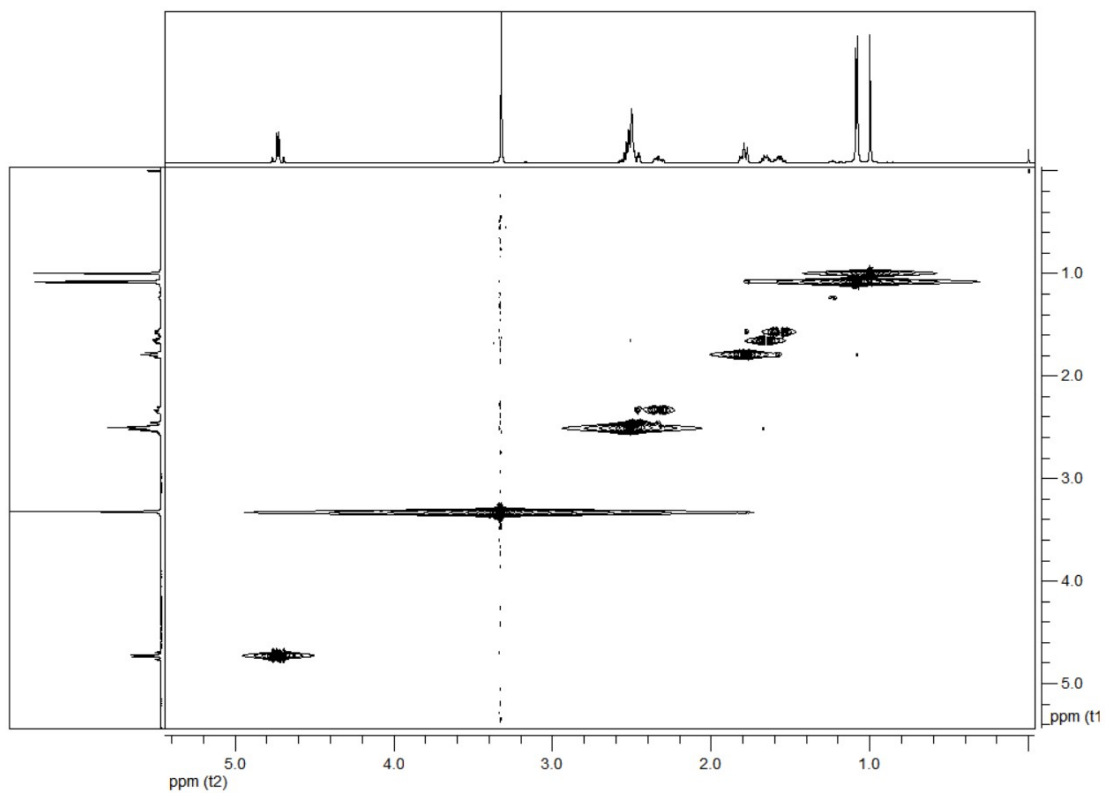

**Fig S5** NOESY spectrum of compound **1** (DMSO- $d_6$ )

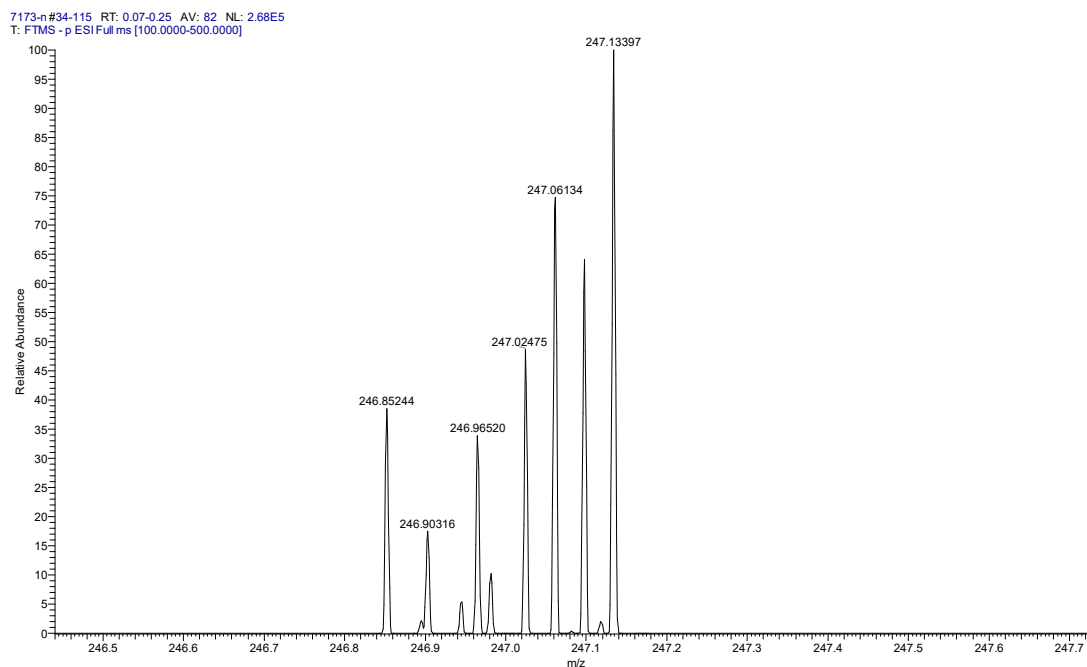

**Fig S6** HRESIMS spectrum of compound **1** (MeOH)

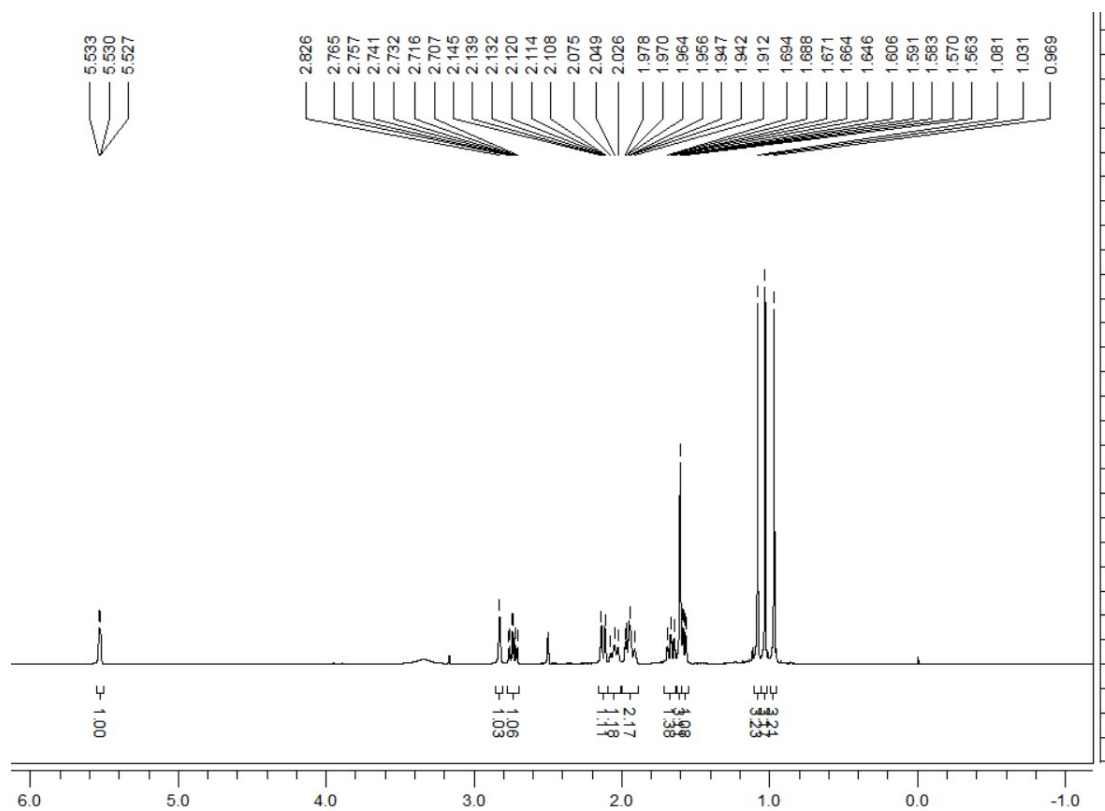

**Fig S7**  $^1\text{H}$ -NMR spectrum of compound **2** ( $\text{DMSO-}d_6$ , 600 MHz)

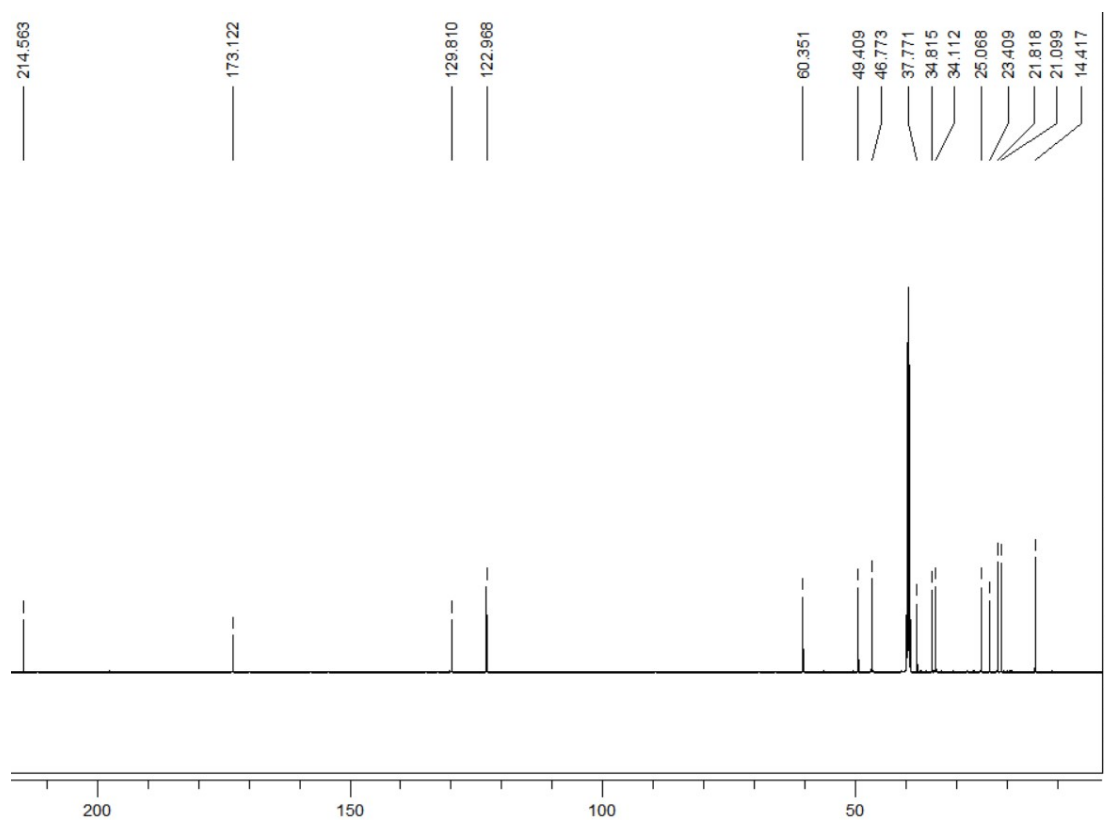

**Fig S8**  $^{13}\text{C}$ -NMR spectrum of compound **2** ( $\text{DMSO-}d_6$ , 150 MHz)

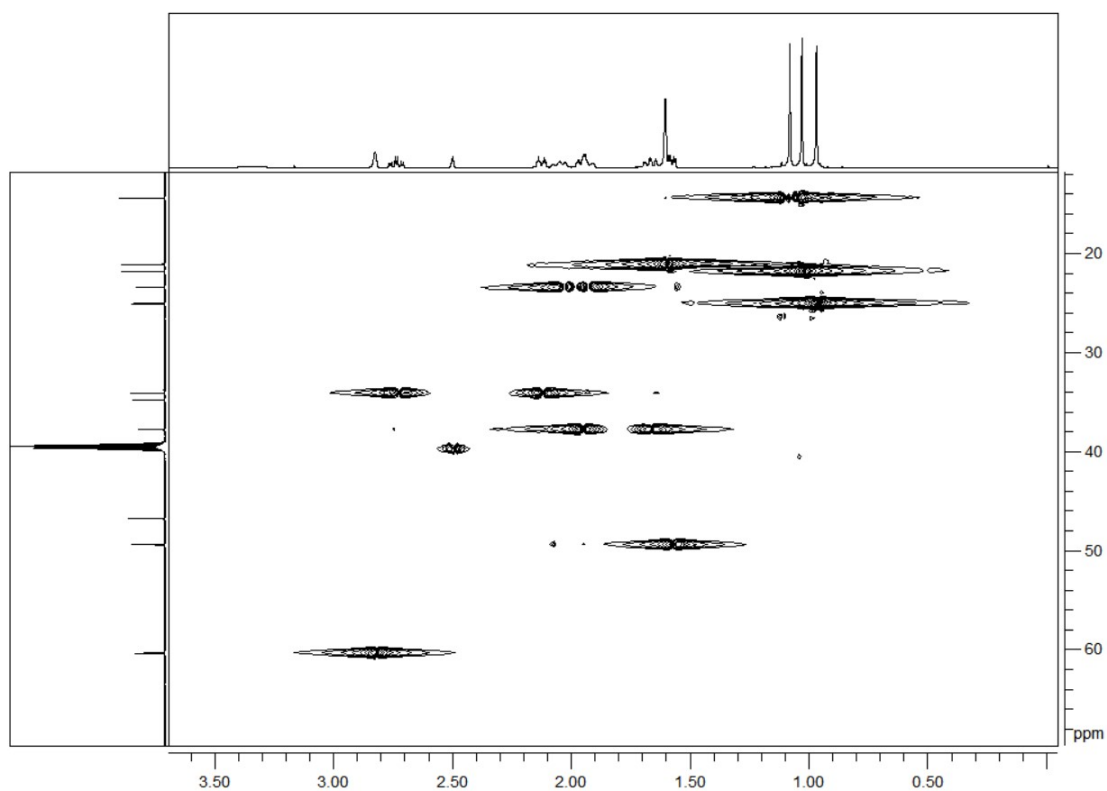

**Fig S9** HSQC spectrum of compound **2** (DMSO- $d_6$ )

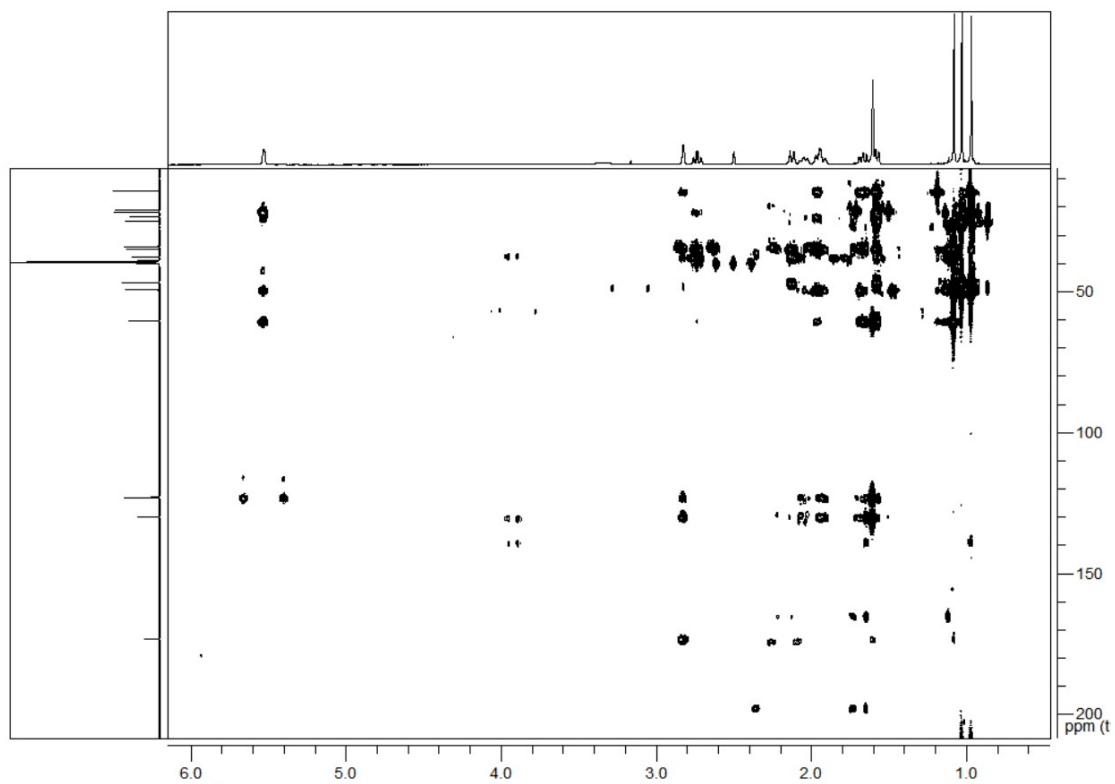

**Fig S10** HMBC spectrum of compound **2** (DMSO- $d_6$ )

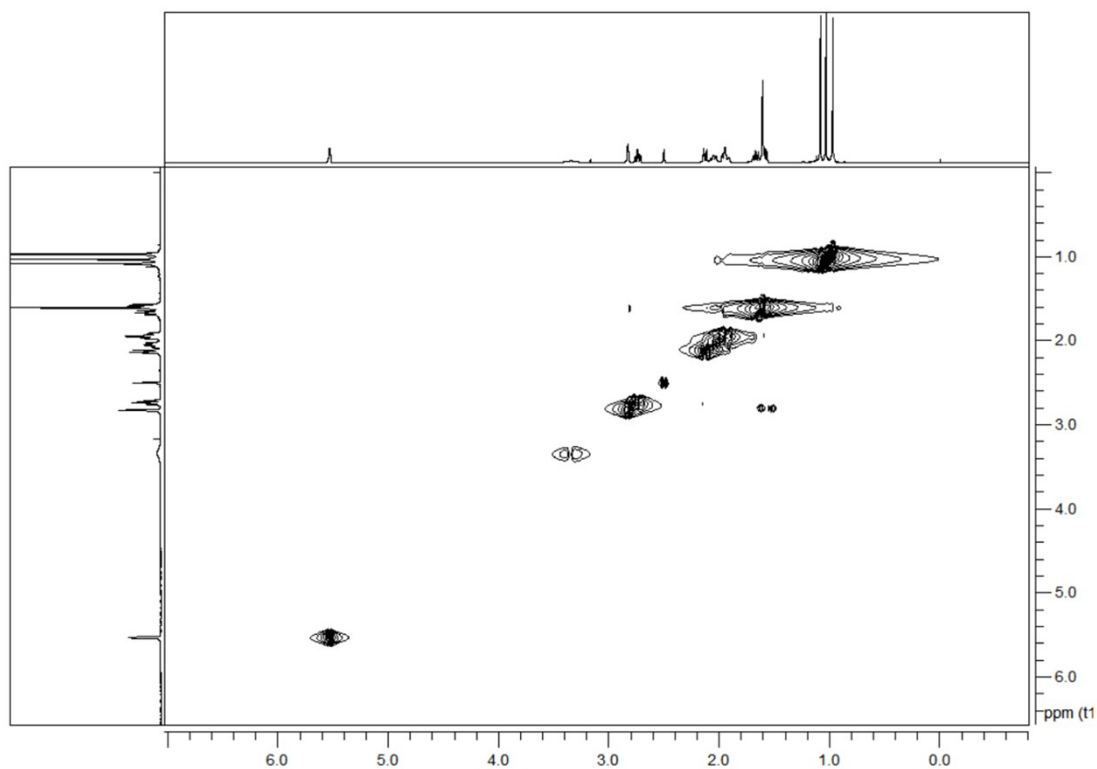

**Fig S11** NOESY spectrum of compound **2** (DMSO- $d_6$ )

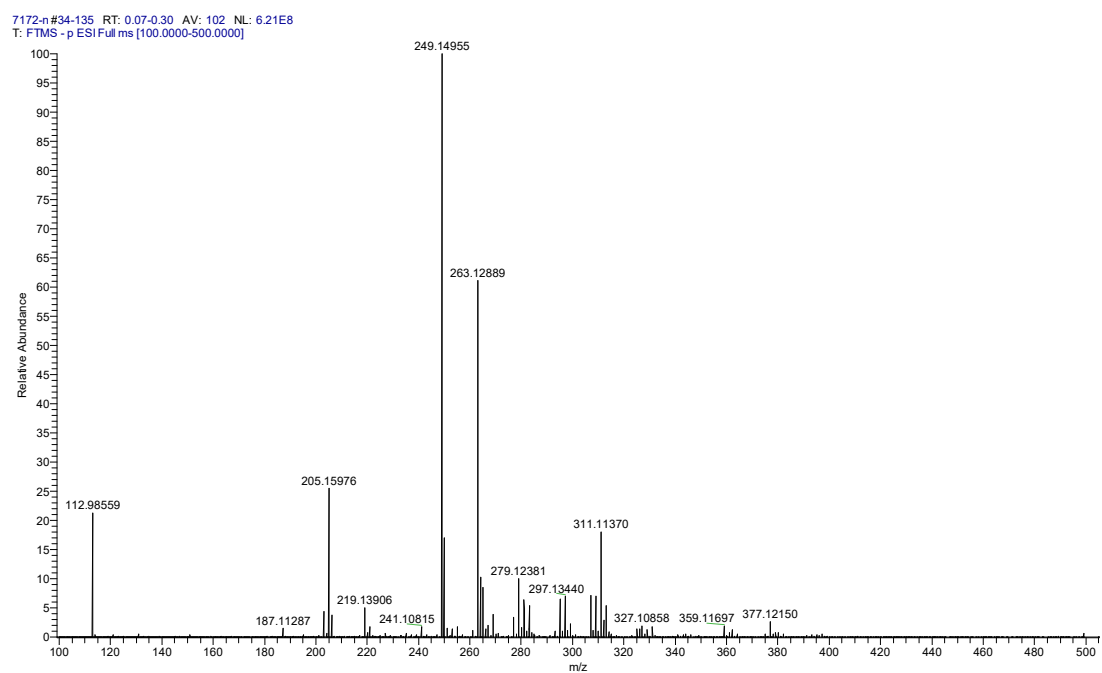

**Fig S12** HRMSIMS spectrum of compound **2** (MeOH)



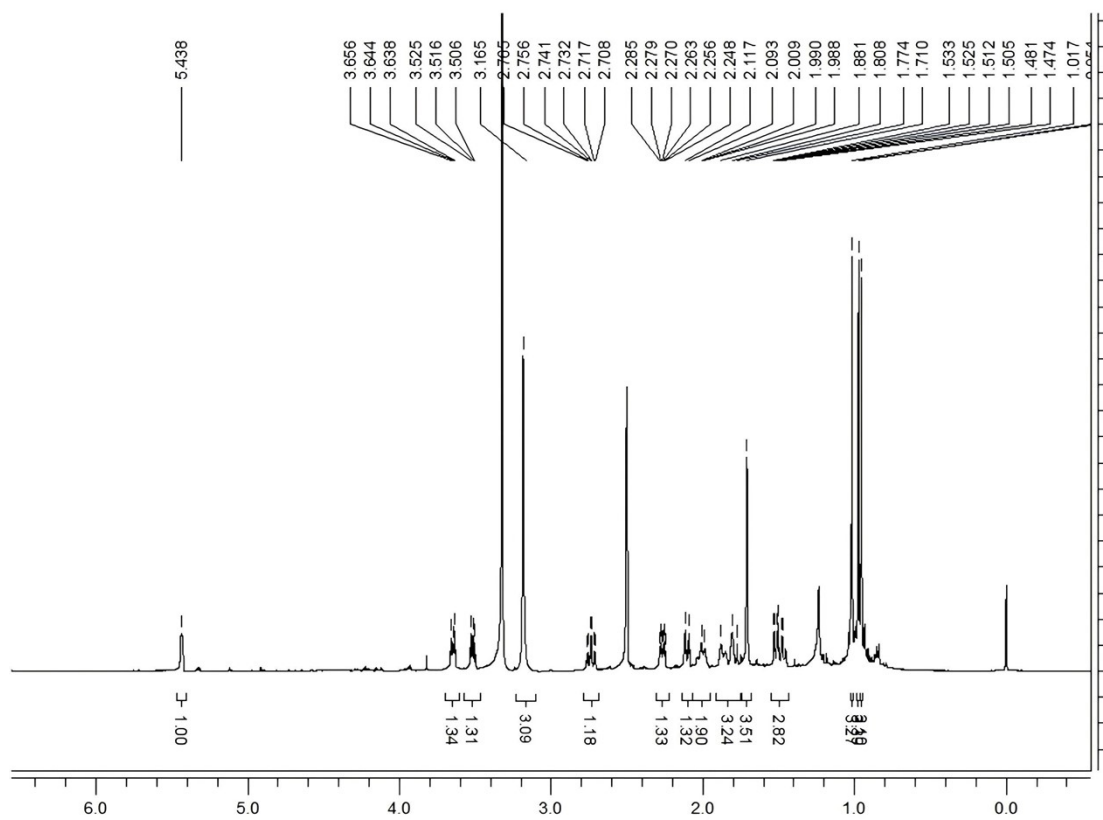

**Fig S13**  $^1\text{H}$ -NMR spectrum of compound **3** ( $\text{DMSO-}d_6$ , 600 MHz)

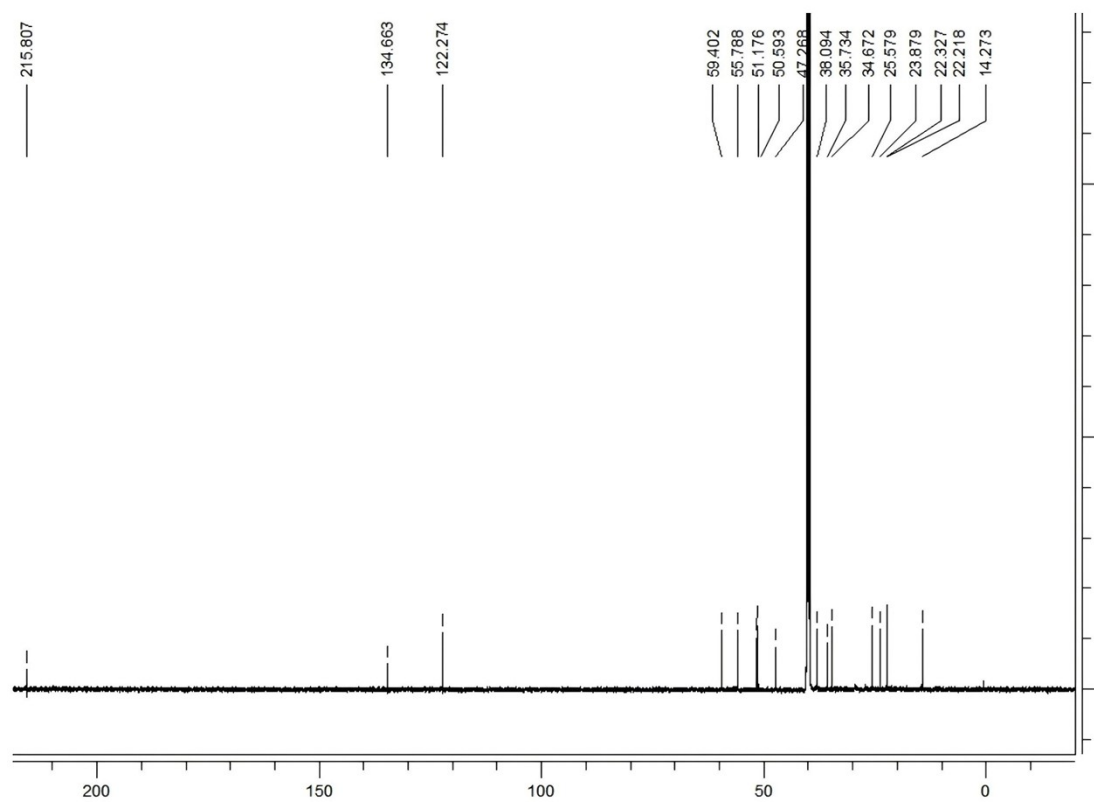

**Fig S14**  $^{13}\text{C}$ -NMR spectrum of compound **3** ( $\text{DMSO-}d_6$ , 150 MHz)

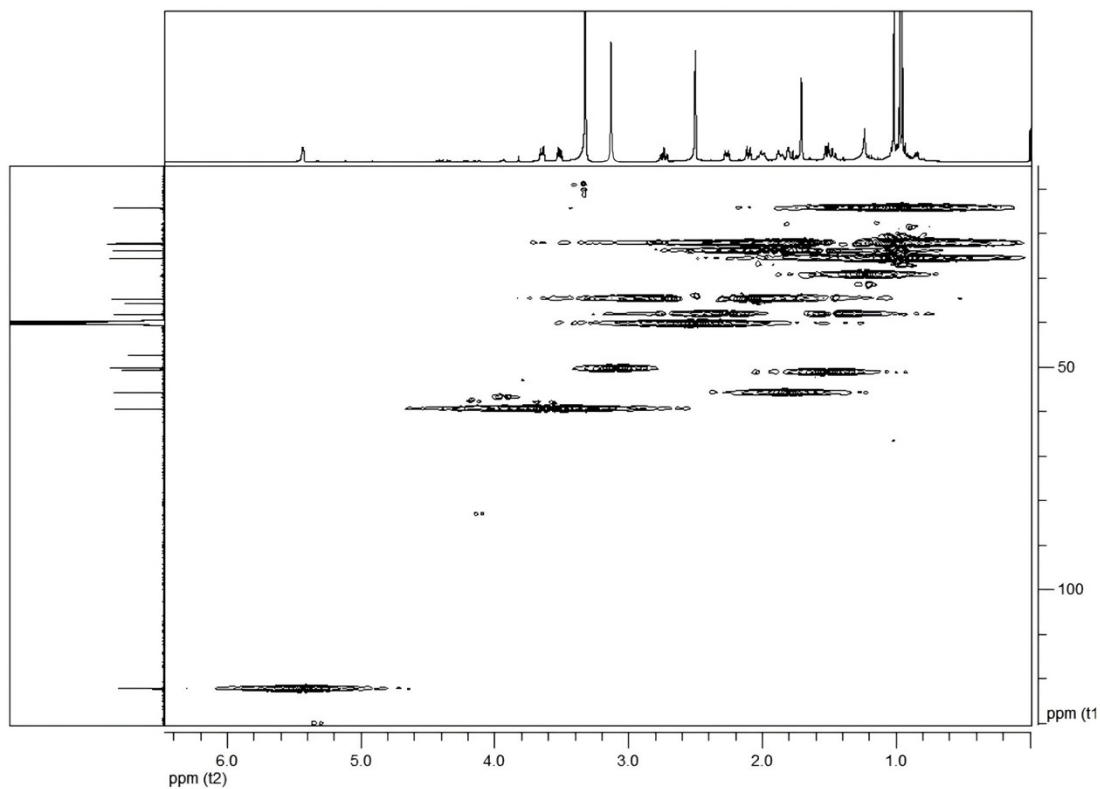

**Fig S15** HSQC spectrum of compound **3** (DMSO- $d_6$ )

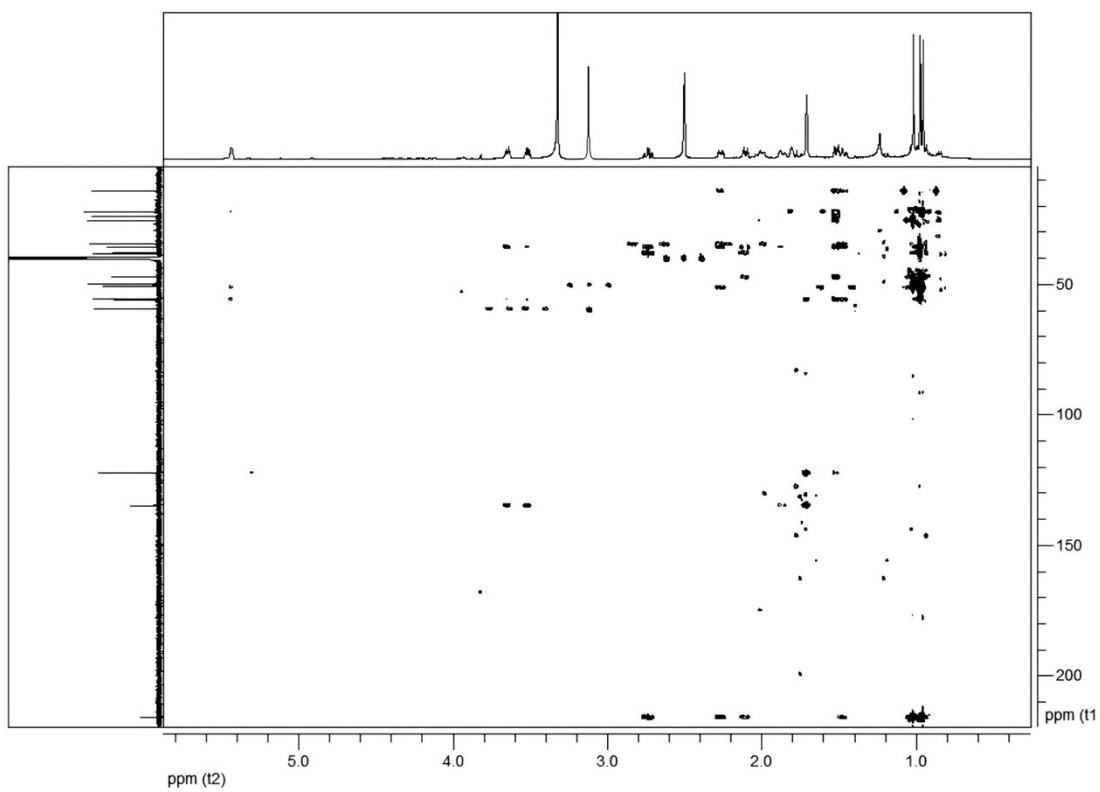

**Fig S16** HMBC spectrum of compound **3** (DMSO- $d_6$ )

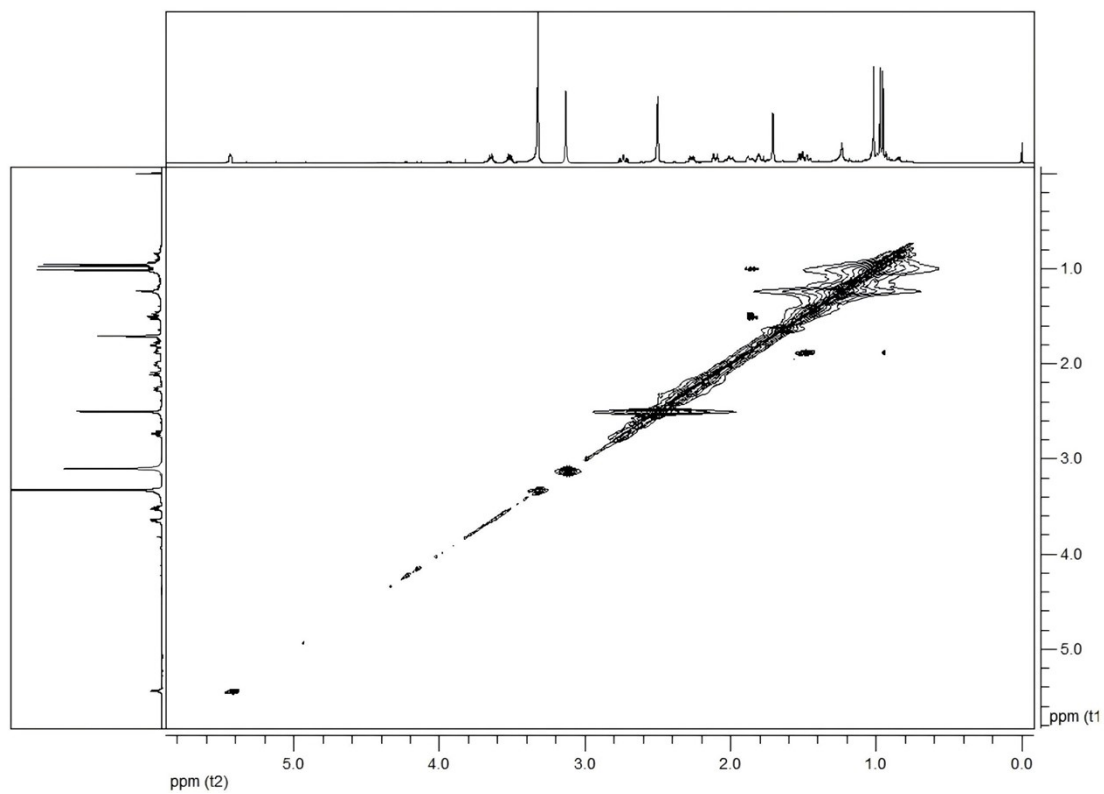

**Fig S17** NOESY spectrum of compound **3** (DMSO- $d_6$ )

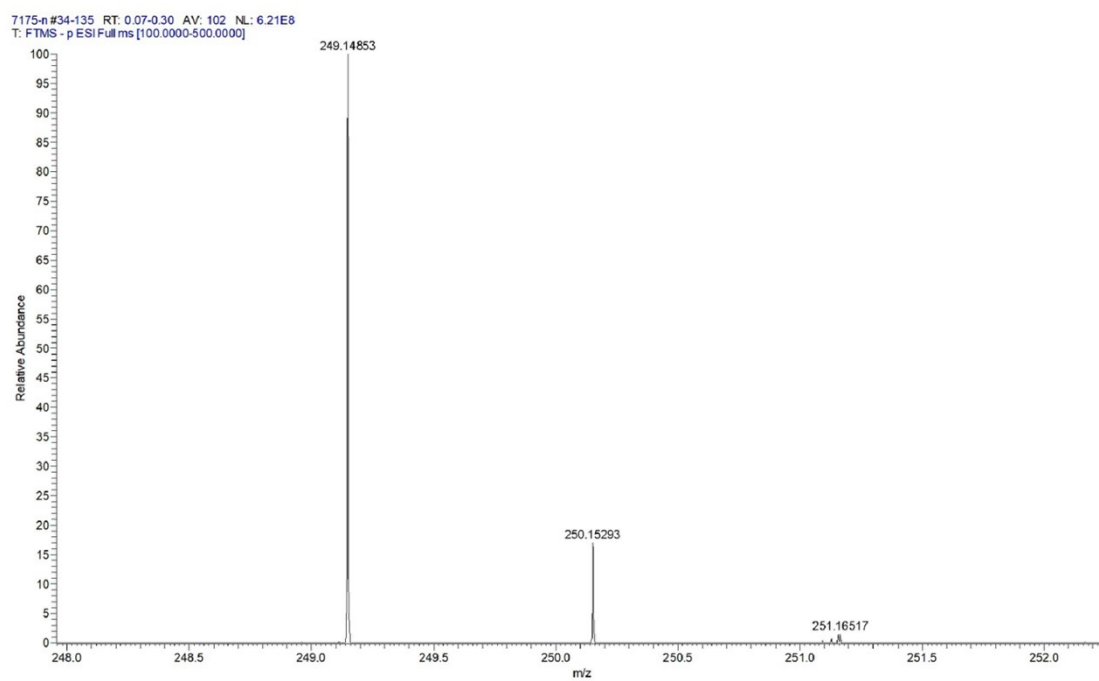

**Fig S18** HRMSIMS spectrum of compound **3** (MeOH)

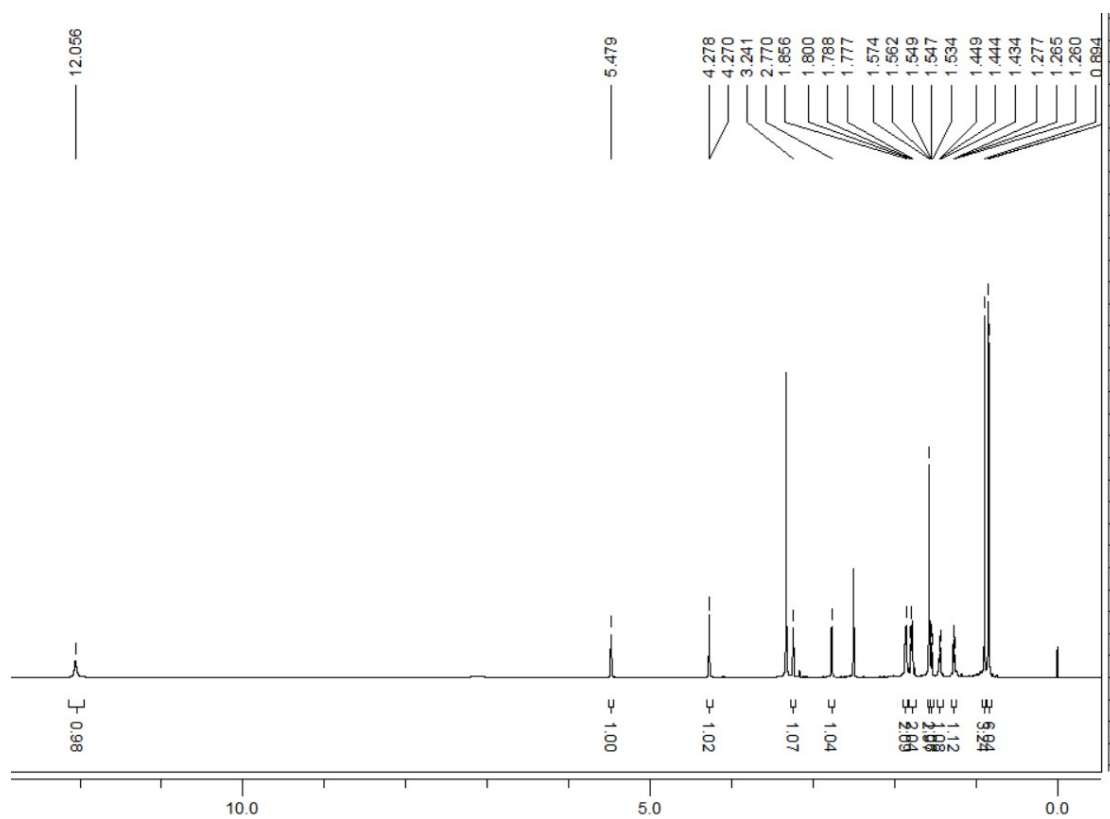

**Fig S19**  $^1\text{H}$ -NMR spectrum of compound **4** ( $\text{DMSO-}d_6$ , 600 MHz)

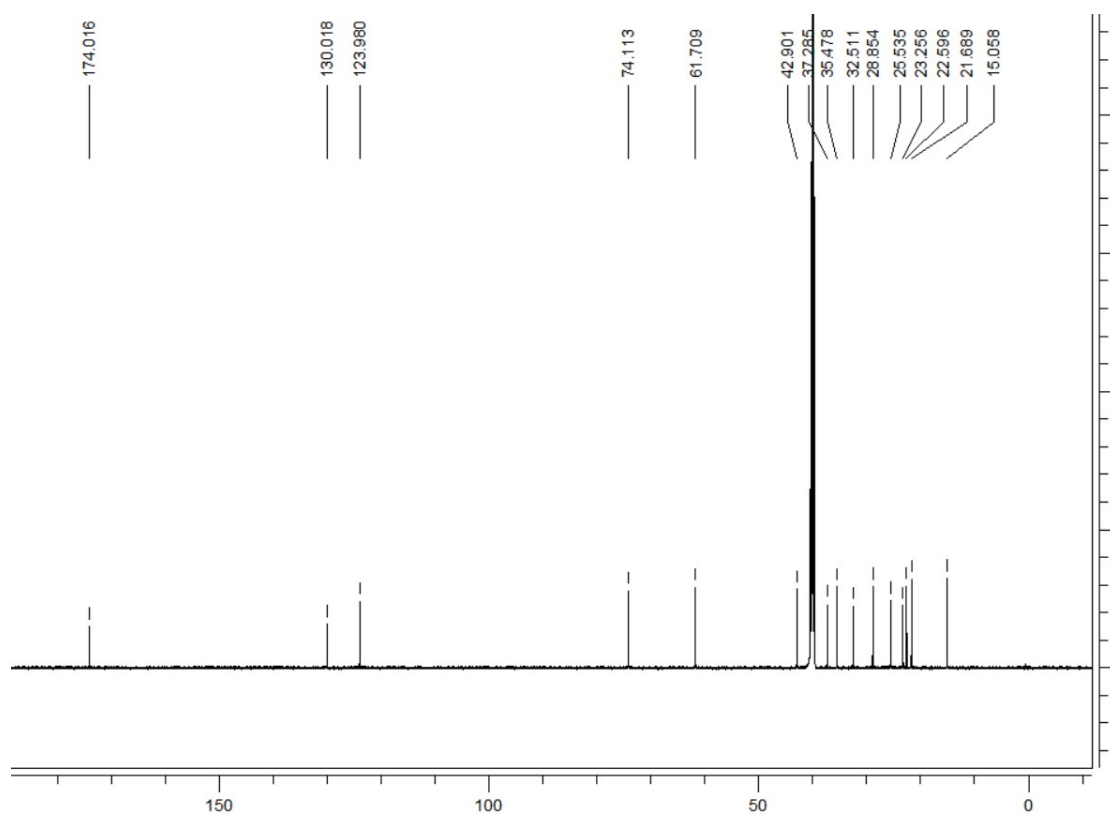

**Fig S20**  $^{13}\text{C}$ -NMR spectrum of compound **4** ( $\text{DMSO-}d_6$ , 150 MHz)

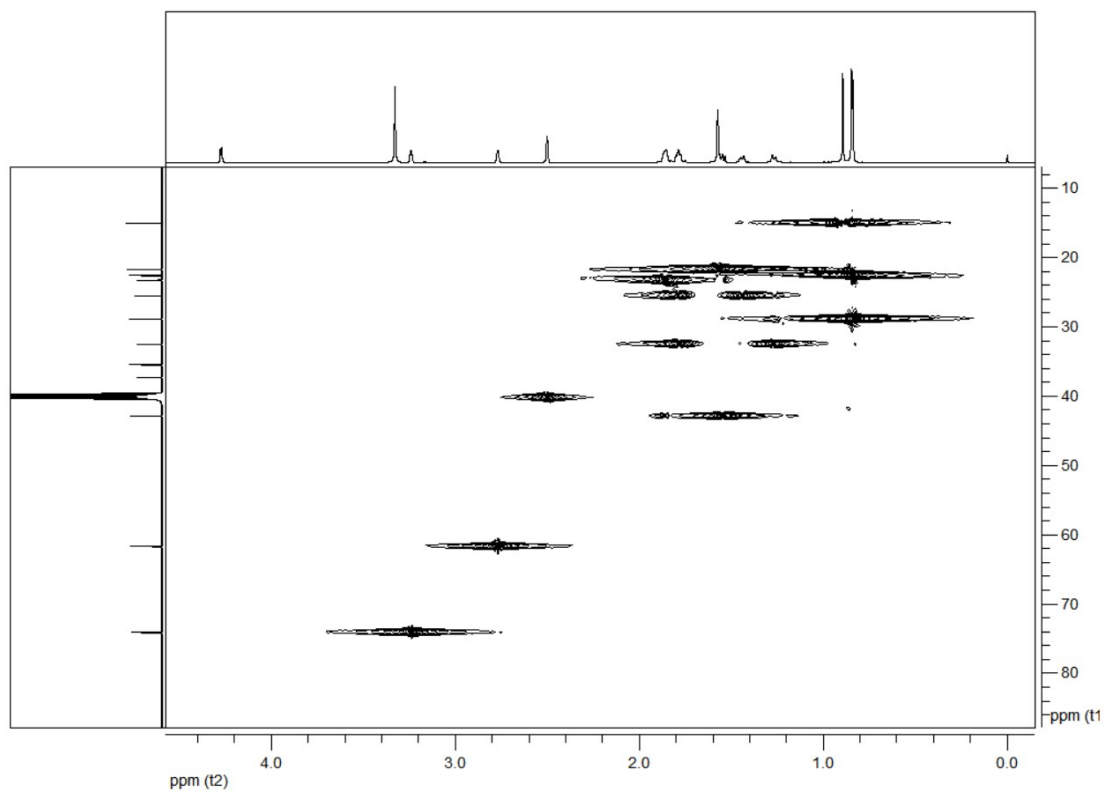

**Fig S21** HSQC spectrum of compound **4** (DMSO- $d_6$ )

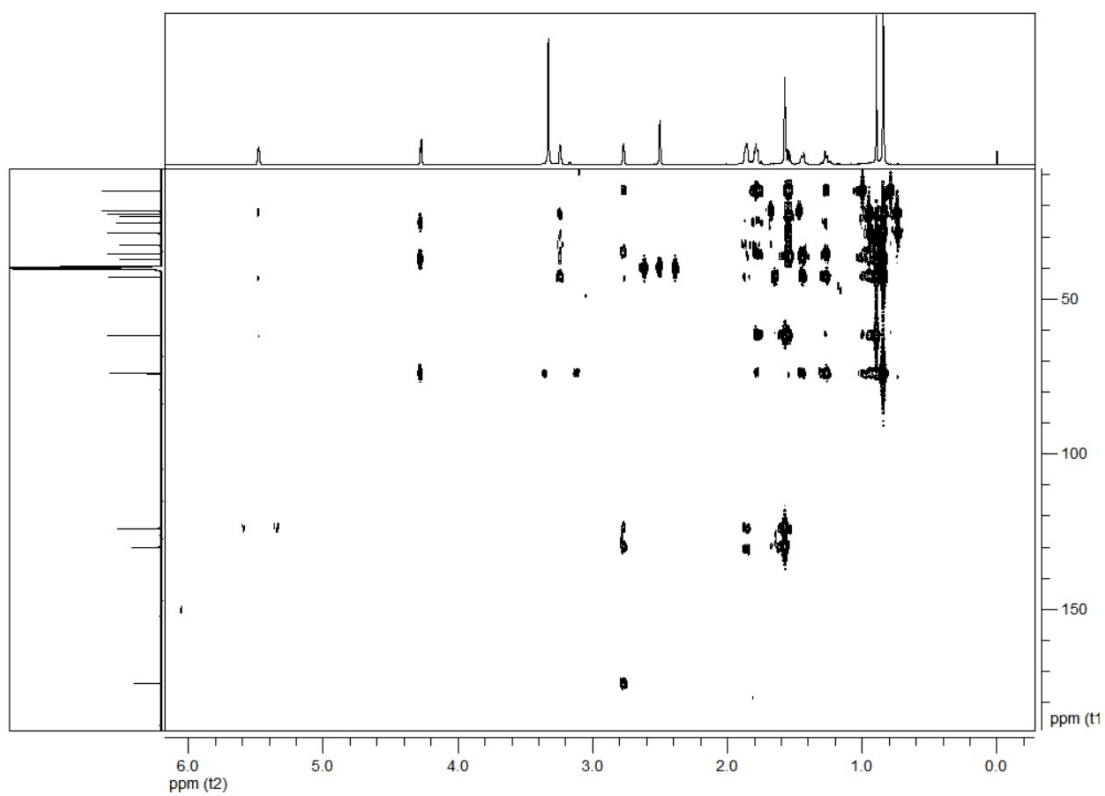

**Fig S22** HMBC spectrum of compound **4** (DMSO- $d_6$ )

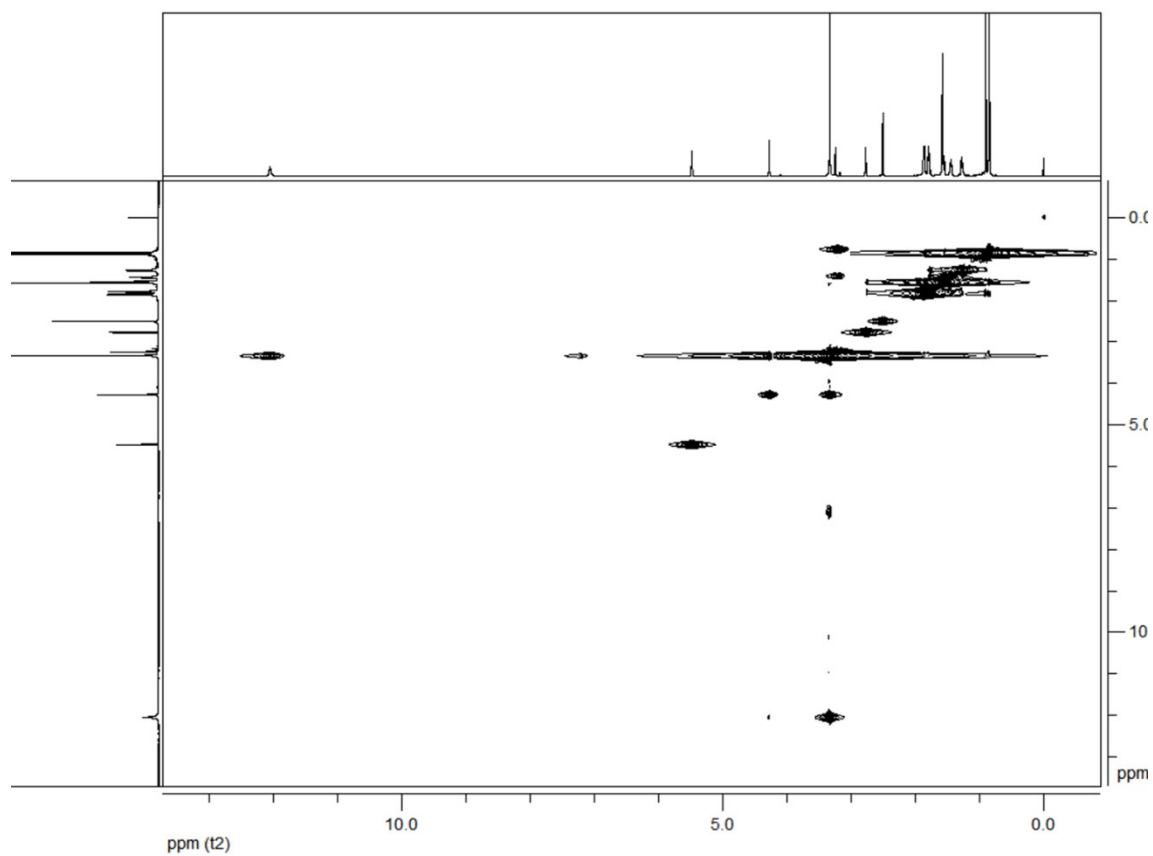

**Fig S23** NOESY spectrum of compound **4** (DMSO- $d_6$ )

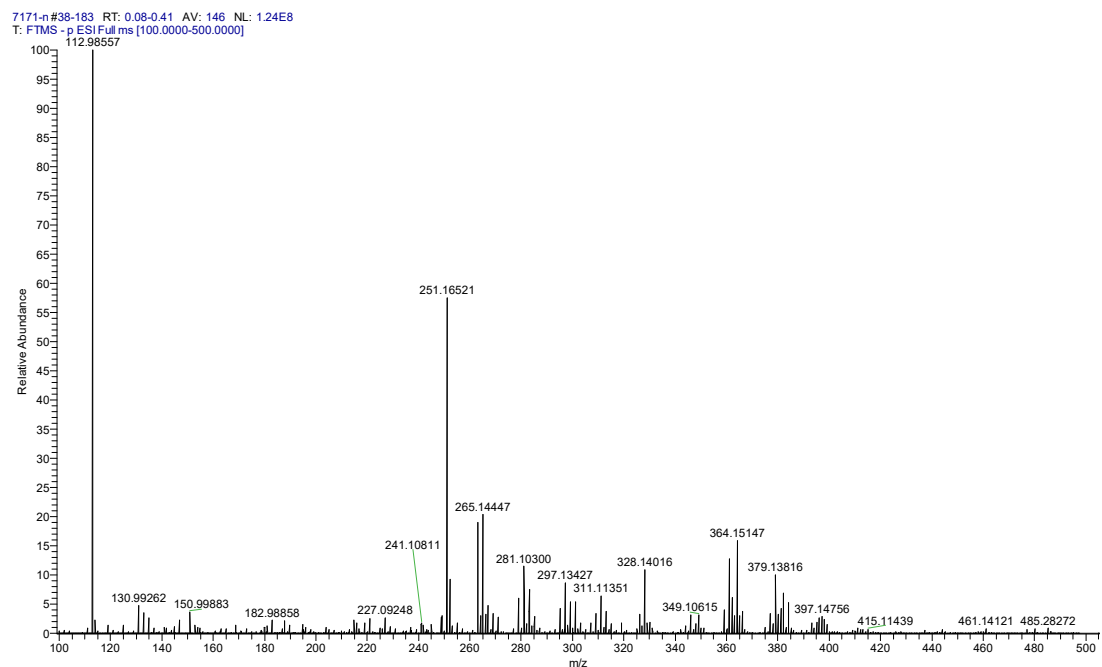

**Fig S24** HRESIMS spectrum of compound **4** (MeOH)

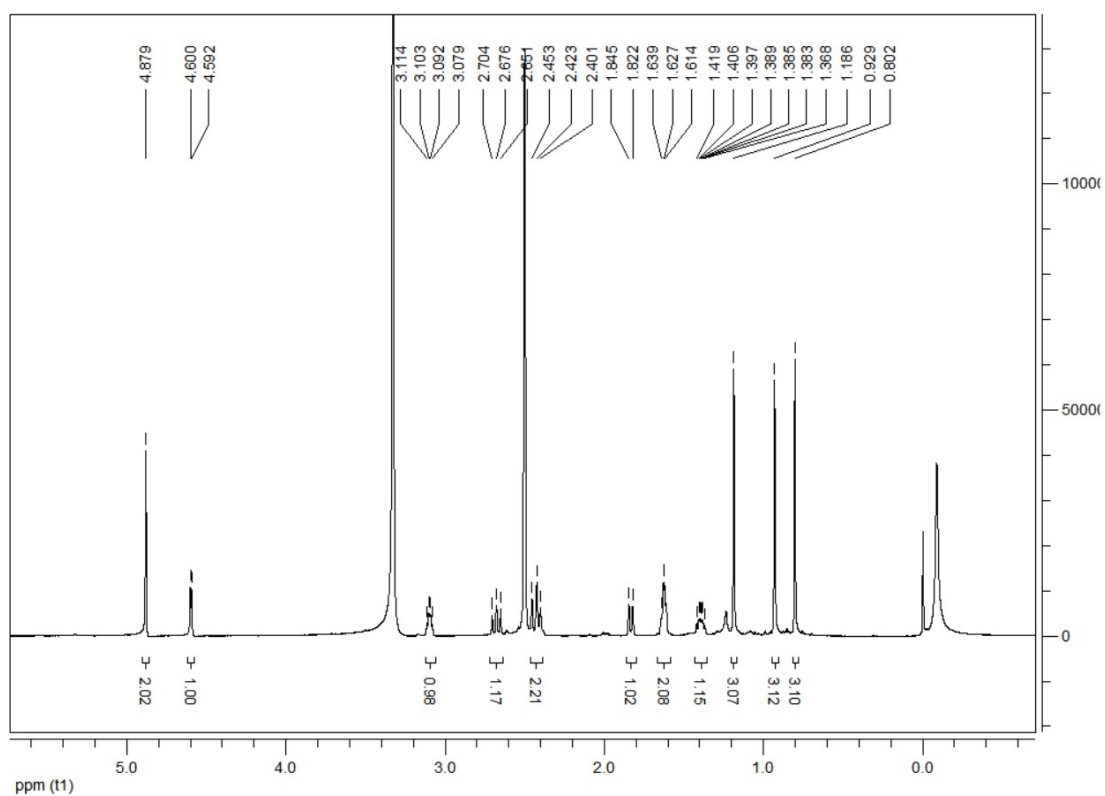

**Fig S25**  $^1\text{H}$ -NMR spectrum of compound **5** (DMSO- $d_6$ , 600 MHz)

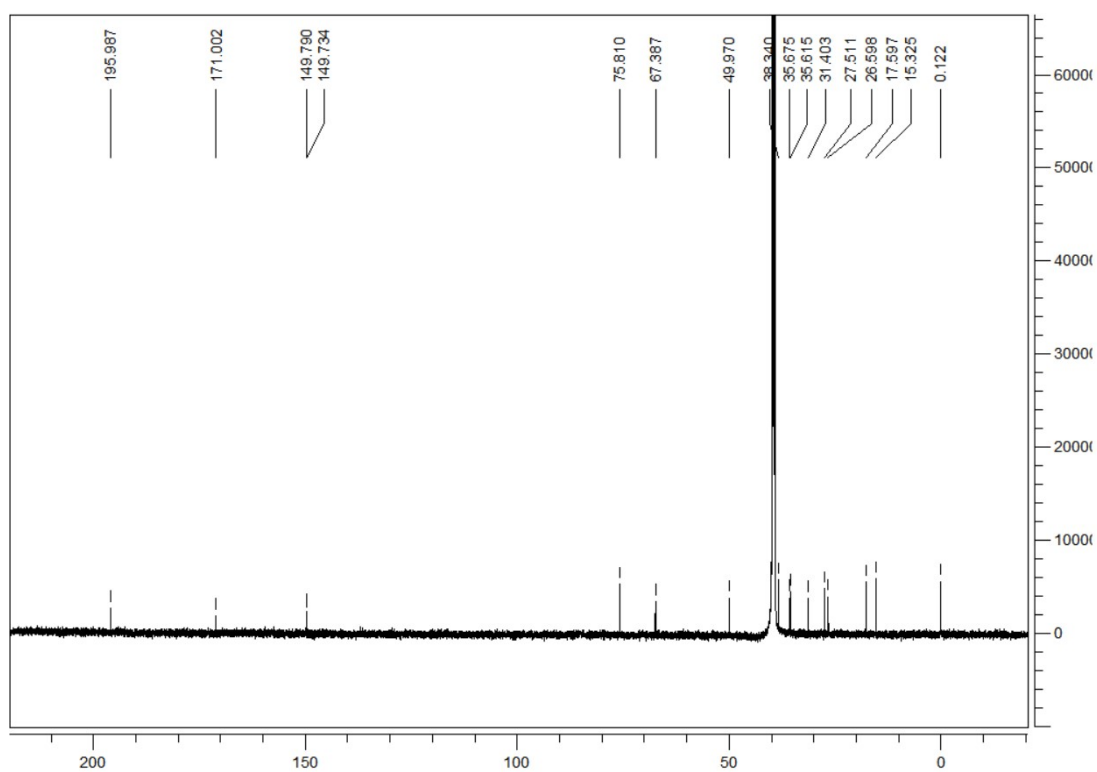

**Fig S26**  $^{13}\text{C}$ -NMR spectrum of compound **5** (DMSO- $d_6$ , 150 MHz)

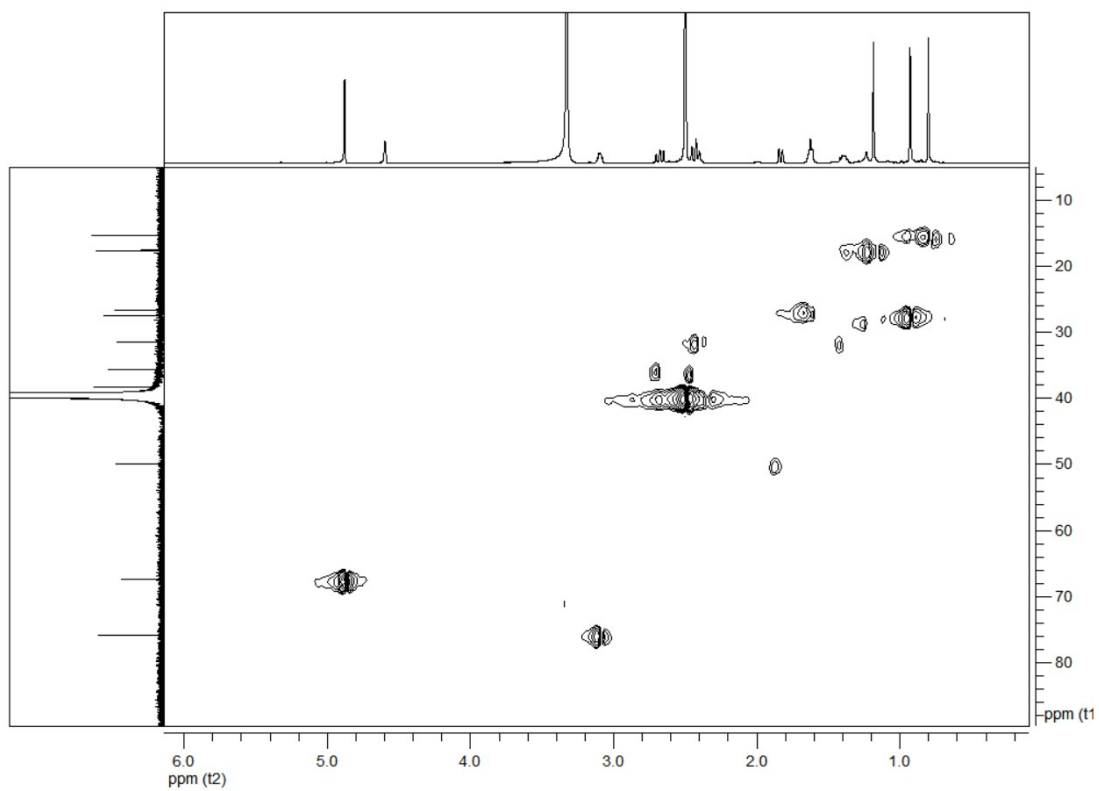

**Fig S27** HSQC spectrum of compound **5** (DMSO- $d_6$ )

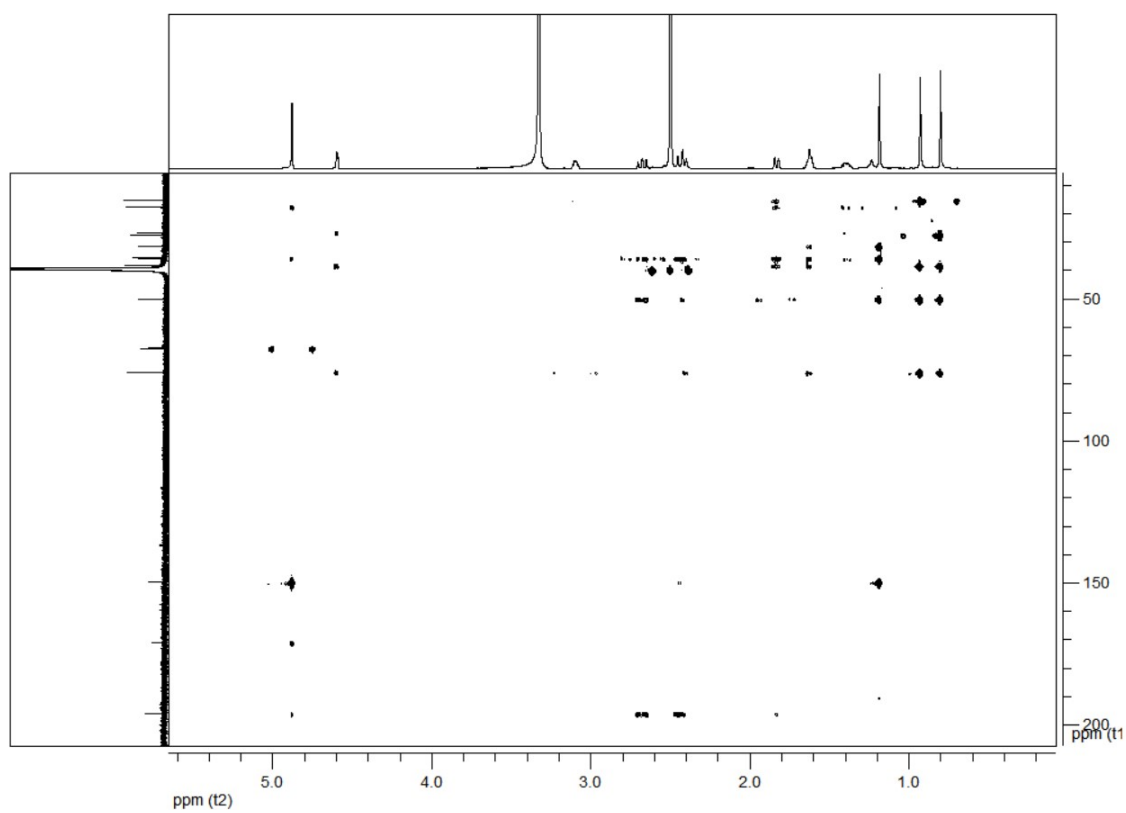

**Fig S28** HMBC spectrum of compound **5** (DMSO- $d_6$ )



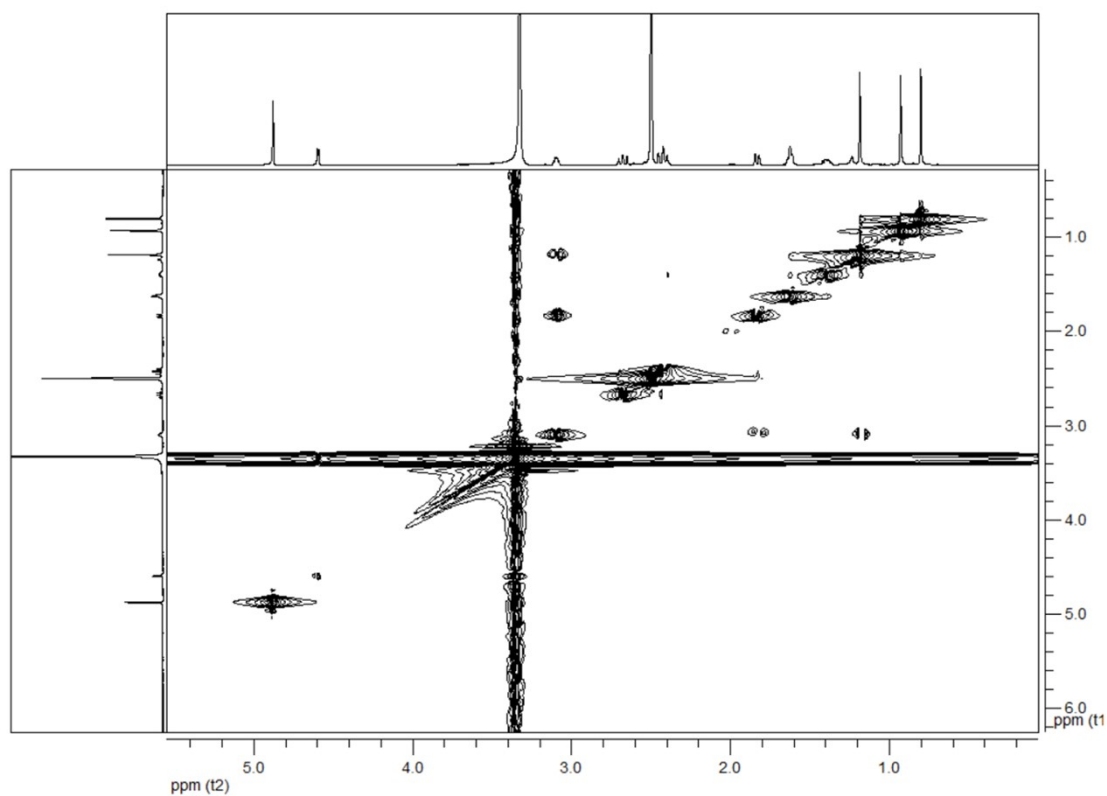

**Fig S29** NOESY spectrum of compound **5** (DMSO- $d_6$ )

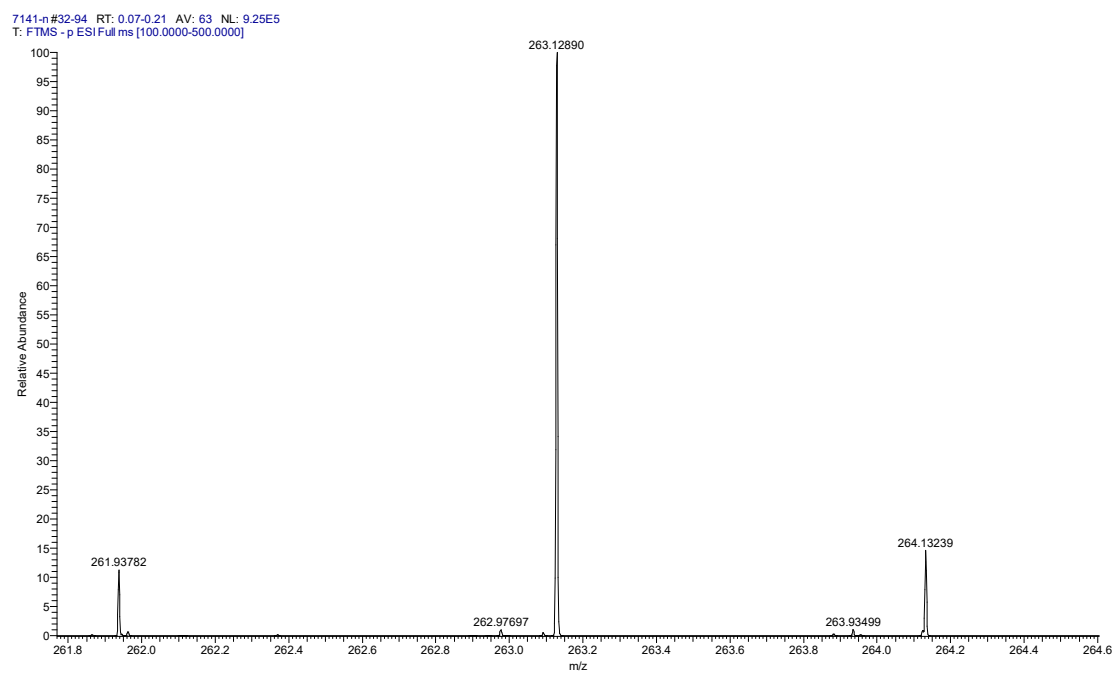

**Fig S30** HRESIMS spectrum of compound **5** (MeOH)



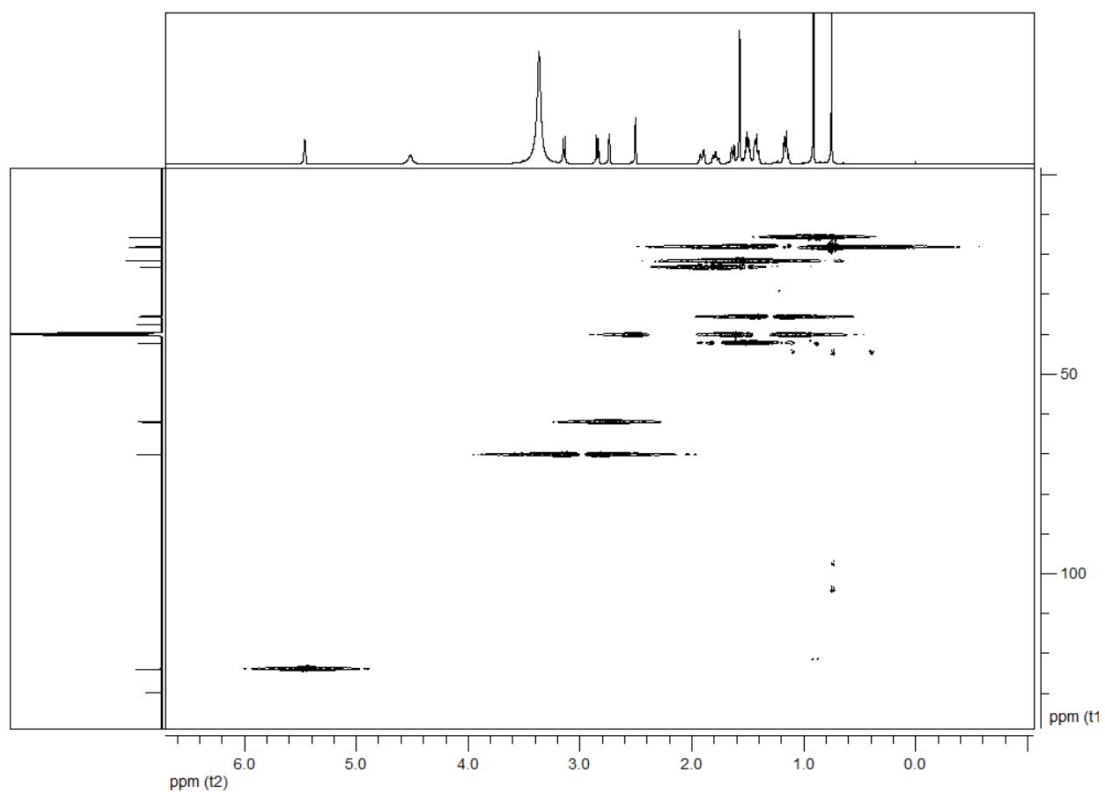

**Fig S33** HSQC spectrum of compound **6** (DMSO- $d_6$ )

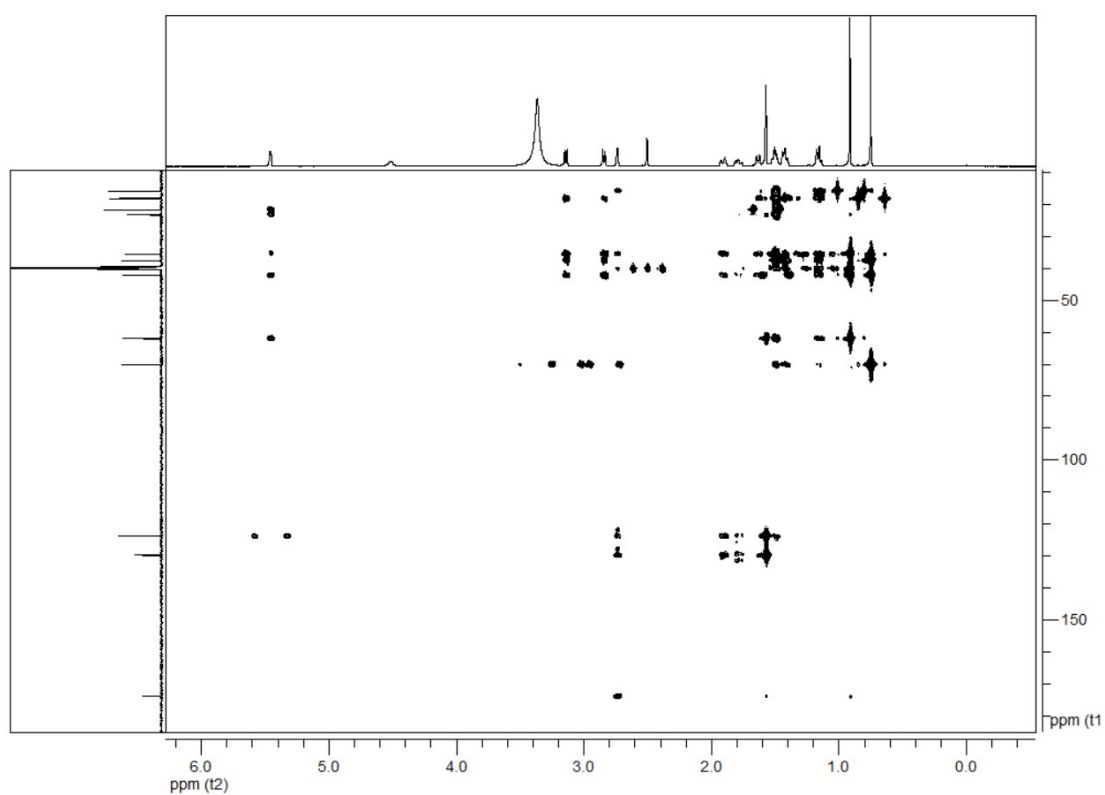

**Fig S34** HMBC spectrum of compound **6** (DMSO- $d_6$ )

7176-n#38-183 RT: 0.08-0.41 AV: 146 NL: 7.14E7  
T: FTMS - p ESI Full ms [100.0000-500.0000]

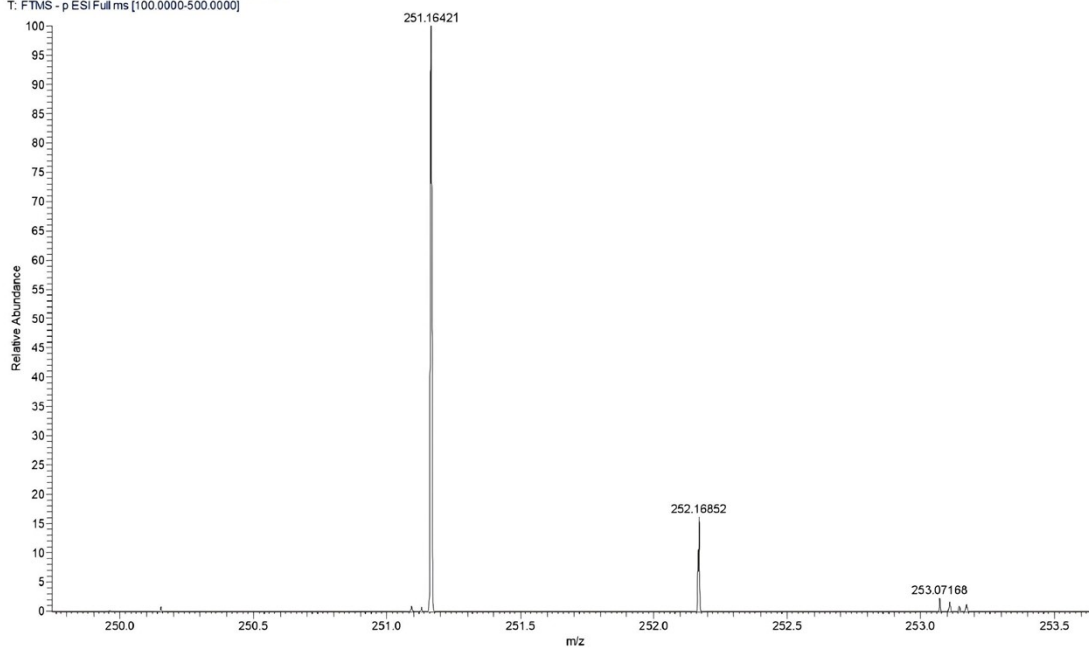

Fig S35 HRESIMS spectrum of compound 6 (MeOH)

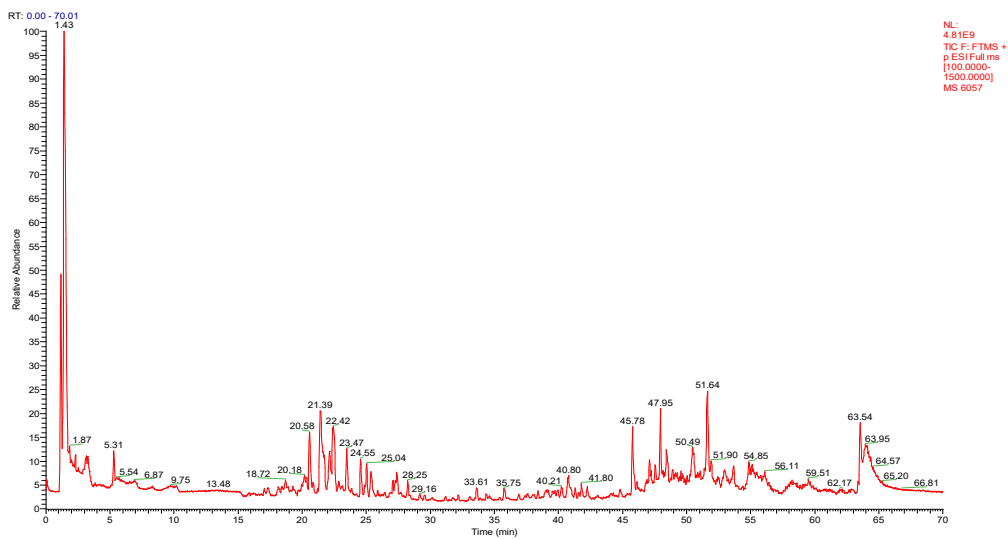

Fig S36 TIC scan of positive ion mode.

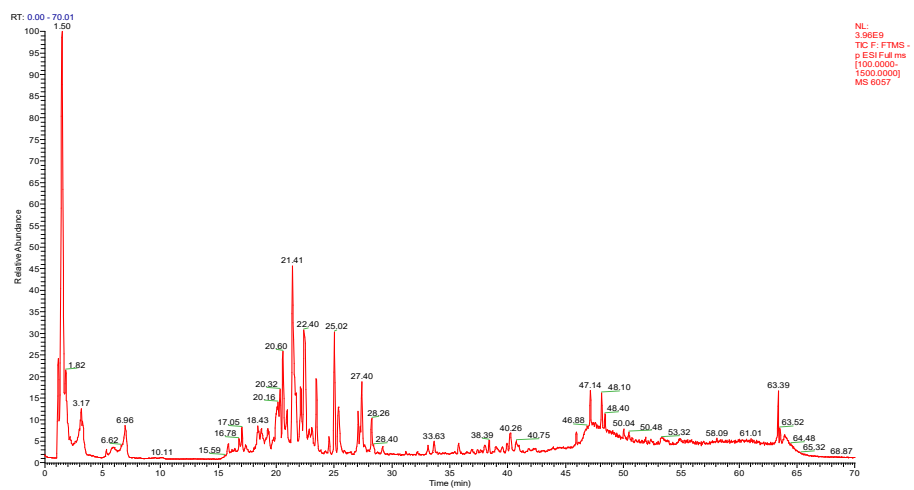

**Fig S37** TIC scan of negative ion mode.

**Table S1** Qualitative study of chemical constituents (terpenes are marked in red ) in *L.**sinense*

| No. | Name of Compounds                  | Molecular Formula                                             | Molecular Weight | Retention Time (min) | Matching Score | Peak Area   | Relative Amount (%) |
|-----|------------------------------------|---------------------------------------------------------------|------------------|----------------------|----------------|-------------|---------------------|
| 1   | Astragalin                         | C <sub>21</sub> H <sub>20</sub> O <sub>11</sub>               | 448.10057        | 22.43                | 89.8           | 9274917989  | 14.689              |
| 2   | Eriodictyol                        | C <sub>15</sub> H <sub>12</sub> O <sub>6</sub>                | 288.06323        | 25.025               | 90.3           | 5254255258  | 8.321               |
| 3   | 2-Pyrrolidinecarboxylic acid       | C <sub>5</sub> H <sub>9</sub> NO <sub>2</sub>                 | 115.06343        | 1.504                | 83             | 4474868465  | 7.087               |
| 4   | Citric acid                        | C <sub>6</sub> H <sub>8</sub> O <sub>7</sub>                  | 192.02703        | 1.596                | 89.3           | 3662073133  | 5.800               |
| 5   | Luteolin                           | C <sub>15</sub> H <sub>10</sub> O <sub>6</sub>                | 286.04771        | 25.381               | 90.6           | 3530575938  | 5.592               |
| 6   | Hesperetin                         | C <sub>16</sub> H <sub>14</sub> O <sub>6</sub>                | 302.07892        | 27.408               | 82.3           | 3381200185  | 5.355               |
| 7   | Myricetin                          | C <sub>15</sub> H <sub>10</sub> O <sub>8</sub>                | 318.03761        | 21.422               | 90.7           | 3293405865  | 5.216               |
| 8   | Morin                              | C <sub>15</sub> H <sub>10</sub> O <sub>7</sub>                | 302.04277        | 21.535               | 88.4           | 2313117979  | 3.663               |
| 9   | Kaempferol                         | C <sub>15</sub> H <sub>10</sub> O <sub>6</sub>                | 286.04787        | 22.41                | 89.6           | 2296853392  | 3.638               |
| 10  | Ethyl gallate                      | C <sub>9</sub> H <sub>10</sub> O <sub>5</sub>                 | 198.05277        | 20.959               | 93.4           | 2253928305  | 3.570               |
| 11  | Quercetin                          | C <sub>15</sub> H <sub>10</sub> O <sub>7</sub>                | 302.04277        | 22.51                | 86.3           | 2222657047  | 3.520               |
| 12  | (-)-Epigallocatechin gallate       | C <sub>22</sub> H <sub>18</sub> O <sub>11</sub>               | 458.08494        | 20.137               | 92.8           | 2007546045  | 3.179               |
| 13  | Apigenin                           | C <sub>15</sub> H <sub>10</sub> O <sub>5</sub>                | 270.05281        | 27.264               | 90.1           | 1690845337  | 2.678               |
| 14  | Pyrogallol                         | C <sub>6</sub> H <sub>6</sub> O <sub>3</sub>                  | 126.0316         | 6.974                | 87.1           | 1193484071  | 1.890               |
| 15  | Trigonelline HCl                   | C <sub>7</sub> H <sub>7</sub> NO <sub>2</sub>                 | 137.04781        | 1.502                | 88.1           | 1178497981  | 1.866               |
| 16  | Naringenin                         | C <sub>15</sub> H <sub>12</sub> O <sub>5</sub>                | 272.06836        | 27.084               | 91.1           | 1001919566  | 1.587               |
| 17  | $\alpha$ -Linolenic acid           | C <sub>18</sub> H <sub>30</sub> O <sub>2</sub>                | 278.22466        | 40.24                | 89.2           | 768354265.9 | 1.217               |
| 18  | Ellagic acid                       | C <sub>14</sub> H <sub>6</sub> O <sub>8</sub>                 | 302.00606        | 21.582               | 85.6           | 734884837.4 | 1.164               |
| 19  | Pinoresinol 4-O-glucoside          | C <sub>26</sub> H <sub>32</sub> O <sub>11</sub>               | 520.1946         | 22.07                | 89             | 496203609.2 | 0.786               |
| 20  | Cynaroside                         | C <sub>21</sub> H <sub>20</sub> O <sub>11</sub>               | 448.10065        | 23.086               | 84.4           | 365955756.8 | 0.580               |
| 21  | Corilagin                          | C <sub>27</sub> H <sub>22</sub> O <sub>18</sub>               | 634.08082        | 19.388               | 87.5           | 341722987.1 | 0.541               |
| 22  | Adenosine                          | C <sub>10</sub> H <sub>13</sub> N <sub>5</sub> O <sub>4</sub> | 267.09696        | 8.296                | 83.8           | 340554208.2 | 0.539               |
| 23  | Epigallocatechin                   | C <sub>15</sub> H <sub>14</sub> O <sub>7</sub>                | 306.07397        | 18.247               | 95.6           | 333056807   | 0.527               |
| 24  | Diosmetin                          | C <sub>16</sub> H <sub>12</sub> O <sub>6</sub>                | 300.06348        | 27.7                 | 83.6           | 285743375.4 | 0.453               |
| 25  | Protocatechualdehyde               | C <sub>7</sub> H <sub>6</sub> O <sub>3</sub>                  | 138.03172        | 20.133               | 75.1           | 258279191   | 0.409               |
| 26  | Phloridzin                         | C <sub>21</sub> H <sub>24</sub> O <sub>10</sub>               | 436.13706        | 23.119               | 86.1           | 257846820.2 | 0.408               |
| 27  | Azelaic acid                       | C <sub>9</sub> H <sub>16</sub> O <sub>4</sub>                 | 188.10489        | 23.033               | 88.6           | 193768242.5 | 0.307               |
| 28  | p-Coumaric acid                    | C <sub>9</sub> H <sub>8</sub> O <sub>3</sub>                  | 164.04739        | 18.712               | 85.8           | 172539163.1 | 0.273               |
| 29  | 2-Hydroxy-4-methoxybenzaldehyde    | C <sub>8</sub> H <sub>8</sub> O <sub>3</sub>                  | 152.04748        | 18.855               | 70.7           | 169143183.8 | 0.268               |
| 30  | Shikimic acid                      | C <sub>7</sub> H <sub>10</sub> O <sub>5</sub>                 | 174.05275        | 2.175                | 89.4           | 163931100.3 | 0.260               |
| 31  | Vitamin D3                         | C <sub>27</sub> H <sub>44</sub> O                             | 384.33943        | 59.871               | 74             | 160475705.1 | 0.254               |
| 32  | Apigenin-7-O- $\beta$ -D-glucoside | C <sub>21</sub> H <sub>20</sub> O <sub>10</sub>               | 432.1057         | 22.646               | 89.2           | 116342998.3 | 0.184               |
| 33  | Kaempferitrin                      | C <sub>27</sub> H <sub>30</sub> O <sub>14</sub>               | 578.16372        | 21.658               | 92             | 109319156.8 | 0.173               |
| 34  | Rutin                              | C <sub>27</sub> H <sub>30</sub> O <sub>16</sub>               | 610.15376        | 21.195               | 91.6           | 107165711   | 0.170               |
| 35  | Coumarin                           | C <sub>9</sub> H <sub>6</sub> O <sub>2</sub>                  | 164.04746        | 19.947               | 73.1           | 105877889.6 | 0.168               |

|           |                                     |                                                               |                  |               |             |                    |              |
|-----------|-------------------------------------|---------------------------------------------------------------|------------------|---------------|-------------|--------------------|--------------|
| 36        | Gallic acid                         | C <sub>7</sub> H <sub>6</sub> O <sub>5</sub>                  | 170.02147        | 20.155        | 86.8        | 99387372.38        | 0.157        |
| 37        | Phloretin                           | C <sub>15</sub> H <sub>14</sub> O <sub>5</sub>                | 274.08423        | 23.122        | 84.1        | 95235391.34        | 0.151        |
| 38        | 5-Hydroxymethylfurfural             | C <sub>6</sub> H <sub>6</sub> O <sub>3</sub>                  | 126.03182        | 15.969        | 71.4        | 95060414.35        | 0.151        |
| 39        | L-Tryptophan                        | C <sub>11</sub> H <sub>12</sub> N <sub>2</sub> O <sub>2</sub> | 204.08983        | 21.742        | 87.2        | 94047657.32        | 0.149        |
| 40        | Esculetin                           | C <sub>9</sub> H <sub>6</sub> O <sub>4</sub>                  | 178.02656        | 19.309        | 87.1        | 93364990.18        | 0.148        |
| 41        | (+)-Pinoresinol                     | C <sub>20</sub> H <sub>22</sub> O <sub>6</sub>                | 358.14149        | 22.073        | 84.7        | 81607289.87        | 0.129        |
| 42        | Vitamin D2                          | C <sub>28</sub> H <sub>44</sub> O                             | 396.33945        | 48.824        | 84.5        | 77920375.75        | 0.123        |
| 43        | Isoalantolactone                    | C <sub>15</sub> H <sub>20</sub> O <sub>2</sub>                | 232.14644        | 33.902        | 82.5        | 75275400.69        | 0.119        |
| 44        | Manninotriose                       | C <sub>18</sub> H <sub>32</sub> O <sub>16</sub>               | 504.16934        | 2.246         | 84.7        | 68428426.9         | 0.108        |
| 45        | Trilobatin                          | C <sub>21</sub> H <sub>24</sub> O <sub>10</sub>               | 436.13693        | 22.081        | 74.5        | 63881223.32        | 0.101        |
| 46        | 5,7-Dihydroxychromone               | C <sub>9</sub> H <sub>6</sub> O <sub>4</sub>                  | 178.02656        | 20.686        | 86.5        | 63557573.85        | 0.101        |
| 47        | Uridine                             | C <sub>9</sub> H <sub>12</sub> N <sub>2</sub> O <sub>6</sub>  | 244.06947        | 5.185         | 92.3        | 58343649.69        | 0.092        |
| 48        | α-Cyperone                          | C <sub>15</sub> H <sub>22</sub> O                             | 218.1672         | 39.249        | 81.6        | 54641995.31        | 0.087        |
| 49        | Kaempferol-3-O-rutinoside           | C <sub>27</sub> H <sub>30</sub> O <sub>15</sub>               | 594.15908        | 21.948        | 89          | 48757353.43        | 0.077        |
| 50        | 4-Methoxysalicylic acid             | C <sub>8</sub> H <sub>8</sub> O <sub>4</sub>                  | 168.04221        | 16.781        | 76.9        | 48630984.23        | 0.077        |
| <b>51</b> | <b>Pachymic acid</b>                | <b>C<sub>33</sub>H<sub>52</sub>O<sub>5</sub></b>              | <b>264.19068</b> | <b>47.802</b> | <b>72.7</b> | <b>46340797.96</b> | <b>0.073</b> |
| 52        | Linolenic acid ethyl ester          | C <sub>20</sub> H <sub>34</sub> O <sub>2</sub>                | 306.25603        | 46.344        | 85.1        | 44293009.83        | 0.070        |
| 53        | 7-Methoxycoumarin                   | C <sub>10</sub> H <sub>8</sub> O <sub>3</sub>                 | 144.02123        | 24.893        | 77.4        | 40985346.95        | 0.065        |
| 54        | Ferulaldehyde                       | C <sub>10</sub> H <sub>10</sub> O <sub>3</sub>                | 178.0631         | 19.885        | 78          | 40078685.81        | 0.063        |
| 55        | Ferulic acid                        | C <sub>10</sub> H <sub>10</sub> O <sub>4</sub>                | 194.05788        | 18.384        | 88.1        | 39761883.67        | 0.063        |
| 56        | Salicylic acid                      | C <sub>7</sub> H <sub>6</sub> O <sub>3</sub>                  | 138.03168        | 18.022        | 81.9        | 39648498.38        | 0.063        |
| 57        | Methyl hexadecanoate                | C <sub>17</sub> H <sub>34</sub> O <sub>2</sub>                | 316.26118        | 37.926        | 73.1        | 39120315.91        | 0.062        |
| 58        | Protocatechuic acid                 | C <sub>7</sub> H <sub>6</sub> O <sub>4</sub>                  | 154.02668        | 20.793        | 84.8        | 38712119.18        | 0.061        |
| 59        | Narcissoside                        | C <sub>28</sub> H <sub>32</sub> O <sub>16</sub>               | 624.16951        | 21.111        | 86.6        | 37880777.16        | 0.060        |
| 60        | Adenine                             | C <sub>5</sub> H <sub>5</sub> N <sub>5</sub>                  | 135.05453        | 2.587         | 71.8        | 37820565.56        | 0.060        |
| 61        | Taxifolin                           | C <sub>15</sub> H <sub>12</sub> O <sub>7</sub>                | 304.05818        | 22.019        | 87.6        | 37387743.06        | 0.059        |
| 62        | Hydroprotopine                      | C <sub>20</sub> H <sub>19</sub> NO <sub>5</sub>               | 353.12651        | 22.73         | 89.4        | 35137134.98        | 0.056        |
| <b>63</b> | <b>Dehydrocostus lactone</b>        | <b>C<sub>15</sub>H<sub>18</sub>O<sub>2</sub></b>              | <b>230.13075</b> | <b>20.042</b> | <b>85.6</b> | <b>34342464.54</b> | <b>0.054</b> |
| 64        | Methyl 4-hydroxy-3-methoxycinnamate | C <sub>11</sub> H <sub>12</sub> O <sub>4</sub>                | 208.07363        | 23.104        | 73          | 34233805.94        | 0.054        |
| 65        | Atractylenolide I                   | C <sub>15</sub> H <sub>18</sub> O <sub>2</sub>                | 248.1413         | 20.309        | 79.6        | 33929756.92        | 0.054        |
| 66        | Ethyl 3,4-dihydroxybenzoate         | C <sub>9</sub> H <sub>10</sub> O <sub>4</sub>                 | 182.05795        | 23.555        | 83.9        | 30622405.94        | 0.048        |
| 67        | Brevifolincarboxylic acid           | C <sub>13</sub> H <sub>8</sub> O <sub>8</sub>                 | 309.04844        | 19.022        | 85.8        | 29323143.34        | 0.046        |
| 68        | Sinapic acid                        | C <sub>11</sub> H <sub>12</sub> O <sub>5</sub>                | 224.06844        | 18.787        | 90.7        | 28919203.61        | 0.046        |
| 69        | p-Hydroxybenzaldehyde               | C <sub>7</sub> H <sub>6</sub> O <sub>2</sub>                  | 122.03675        | 19.569        | 78.9        | 28446664.11        | 0.045        |
| 70        | Homoorientin                        | C <sub>21</sub> H <sub>20</sub> O <sub>11</sub>               | 448.10076        | 20.437        | 85          | 27928781.29        | 0.044        |
| 71        | Tryptamine                          | C <sub>10</sub> H <sub>12</sub> N <sub>2</sub>                | 160.1001         | 18.153        | 73.8        | 27557365.16        | 0.044        |
| 72        | S-Isocorydine(+)                    | C <sub>20</sub> H <sub>23</sub> NO <sub>4</sub>               | 341.16283        | 21.293        | 79.6        | 26924803.43        | 0.043        |
| 73        | Iristectorigenin B                  | C <sub>17</sub> H <sub>14</sub> O <sub>7</sub>                | 330.07403        | 27.566        | 74.1        | 26624821.88        | 0.042        |
| 74        | Emodin-3-methyl ether/Physcion      | C <sub>16</sub> H <sub>12</sub> O <sub>5</sub>                | 284.06868        | 23.867        | 71.8        | 26018465.16        | 0.041        |
| 75        | Genistein                           | C <sub>15</sub> H <sub>10</sub> O <sub>5</sub>                | 270.05297        | 19.84         | 85.5        | 25120275.24        | 0.040        |
| 76        | L-Tyrosine                          | C <sub>9</sub> H <sub>11</sub> NO <sub>3</sub>                | 181.07394        | 5.124         | 78.5        | 25069448.47        | 0.040        |

|            |                                     |                                                               |                  |               |             |                    |              |
|------------|-------------------------------------|---------------------------------------------------------------|------------------|---------------|-------------|--------------------|--------------|
| 77         | Isorhamnetin                        | C <sub>16</sub> H <sub>12</sub> O <sub>7</sub>                | 316.05846        | 21.109        | 80.4        | 21703541.95        | 0.034        |
| 78         | Artemisinic acid                    | C <sub>15</sub> H <sub>22</sub> O <sub>2</sub>                | 234.16214        | 27.446        | 83.2        | 19242063.7         | 0.030        |
| 79         | Orsellinic acid                     | C <sub>8</sub> H <sub>8</sub> O <sub>4</sub>                  | 168.04228        | 18.919        | 73.2        | 19108302.15        | 0.030        |
| 80         | Panaxtriol                          | C <sub>30</sub> H <sub>52</sub> O <sub>4</sub>                | 476.38695        | 51.684        | 77.6        | 18374228.23        | 0.029        |
| 81         | Epiberberine                        | C <sub>20</sub> H <sub>17</sub> NO <sub>4</sub>               | 335.11583        | 25.289        | 84.6        | 18268870.59        | 0.029        |
| 82         | Methyl 4-hydroxycinnamate           | C <sub>10</sub> H <sub>10</sub> O <sub>3</sub>                | 178.06308        | 6.255         | 78.8        | 18228538.23        | 0.029        |
| 83         | Methyl gallate                      | C <sub>8</sub> H <sub>8</sub> O <sub>5</sub>                  | 184.03715        | 17.449        | 71.3        | 16699997.6         | 0.026        |
| 84         | Deoxyandrographolide                | C <sub>20</sub> H <sub>30</sub> O <sub>4</sub>                | 334.21202        | 35.787        | 74.4        | 15465572.1         | 0.024        |
| <b>85</b>  | <b>Abietic Acid</b>                 | <b>C<sub>20</sub>H<sub>30</sub>O<sub>2</sub></b>              | <b>302.2246</b>  | <b>44.909</b> | <b>71.4</b> | <b>15452228.88</b> | <b>0.024</b> |
| 86         | Isoquercitrin                       | C <sub>21</sub> H <sub>20</sub> O <sub>12</sub>               | 464.09544        | 20.526        | 70.3        | 15283476.22        | 0.024        |
| 87         | Vicenin III                         | C <sub>26</sub> H <sub>28</sub> O <sub>14</sub>               | 564.14823        | 20.209        | 83.8        | 13950759.81        | 0.022        |
| 88         | Indigo                              | C <sub>16</sub> H <sub>10</sub> N <sub>2</sub> O <sub>2</sub> | 262.07427        | 33.075        | 85.6        | 13540631.87        | 0.021        |
| 89         | Pinocembrin                         | C <sub>15</sub> H <sub>12</sub> O <sub>4</sub>                | 256.07362        | 32.394        | 83.2        | 12595571.74        | 0.020        |
| <b>90</b>  | <b>Nardosinone</b>                  | <b>C<sub>15</sub>H<sub>22</sub>O<sub>3</sub></b>              | <b>250.157</b>   | <b>24.335</b> | <b>70.1</b> | <b>12337122.68</b> | <b>0.020</b> |
| 91         | Amentoflavone                       | C <sub>30</sub> H <sub>18</sub> O <sub>10</sub>               | 538.09055        | 29.522        | 85.4        | 11991375.82        | 0.019        |
| 92         | Vicenin II                          | C <sub>27</sub> H <sub>30</sub> O <sub>15</sub>               | 594.15919        | 19.517        | 83.7        | 10983855.74        | 0.017        |
| 93         | Quercitrin                          | C <sub>21</sub> H <sub>20</sub> O <sub>11</sub>               | 448.10088        | 20.948        | 84.8        | 10948781.34        | 0.017        |
| 94         | Lonicerin                           | C <sub>27</sub> H <sub>30</sub> O <sub>15</sub>               | 594.15898        | 19.935        | 73.8        | 9921065.343        | 0.016        |
| <b>95</b>  | <b>Atractylenolide II</b>           | <b>C<sub>15</sub>H<sub>20</sub>O<sub>2</sub></b>              | <b>232.14644</b> | <b>34.708</b> | <b>78.9</b> | <b>9199087.463</b> | <b>0.015</b> |
| 96         | Gentisic acid                       | C <sub>7</sub> H <sub>6</sub> O <sub>4</sub>                  | 154.02664        | 17.984        | 83.7        | 8698650.883        | 0.014        |
| 97         | Baicalin                            | C <sub>21</sub> H <sub>18</sub> O <sub>11</sub>               | 446.08529        | 23.718        | 80.8        | 8664899.096        | 0.014        |
| 98         | Arteannuin                          | C <sub>15</sub> H <sub>20</sub> O <sub>3</sub>                | 248.14129        | 27.945        | 77          | 8641092.281        | 0.014        |
| 99         | Orcinol gentiobioside               | C <sub>19</sub> H <sub>28</sub> O <sub>12</sub>               | 448.15828        | 16.738        | 77.3        | 8347273.665        | 0.013        |
| <b>100</b> | <b>Germacrone</b>                   | <b>C<sub>15</sub>H<sub>22</sub>O</b>                          | <b>218.16721</b> | <b>36.55</b>  | <b>70.2</b> | <b>8090186.028</b> | <b>0.013</b> |
| 101        | 3,5-Dimethoxy-4-hydroxybenzaldehyde | C <sub>9</sub> H <sub>10</sub> O <sub>4</sub>                 | 182.05799        | 19.304        | 75          | 7988630.882        | 0.013        |
| 102        | Steviol                             | C <sub>20</sub> H <sub>30</sub> O <sub>3</sub>                | 318.21907        | 45.53         | 74.2        | 7900744.225        | 0.013        |
| 103        | Senkyunolide A                      | C <sub>12</sub> H <sub>16</sub> O <sub>2</sub>                | 192.11521        | 39.291        | 76.9        | 7817087.243        | 0.012        |
| <b>104</b> | <b>Curdione</b>                     | <b>C<sub>15</sub>H<sub>24</sub>O<sub>2</sub></b>              | <b>236.17768</b> | <b>33.123</b> | <b>78.8</b> | <b>7464166.212</b> | <b>0.012</b> |
| 105        | Cinnamic acid                       | C <sub>9</sub> H <sub>8</sub> O <sub>2</sub>                  | 148.05251        | 21.766        | 79.4        | 7048511.731        | 0.011        |
| <b>106</b> | <b>Sclareolide</b>                  | <b>C<sub>16</sub>H<sub>26</sub>O<sub>2</sub></b>              | <b>250.19336</b> | <b>30.131</b> | <b>88.6</b> | <b>6197688.179</b> | <b>0.010</b> |
| 107        | Cinnamaldehyde                      | C <sub>9</sub> H <sub>8</sub> O                               | 132.05766        | 20.978        | 72.3        | 3211857.556        | 0.005        |
| 108        | Taxifolin 7-rhamnoside              | C <sub>21</sub> H <sub>22</sub> O <sub>11</sub>               | 450.11503        | 17.319        | 72.1        | 1830755.843        | 0.003        |
| 109        | Parthenolide                        | C <sub>15</sub> H <sub>20</sub> O <sub>3</sub>                | 248.14127        | 32.302        | 72          | 1653947.96         | 0.003        |



### 3-Acetylphenanthren

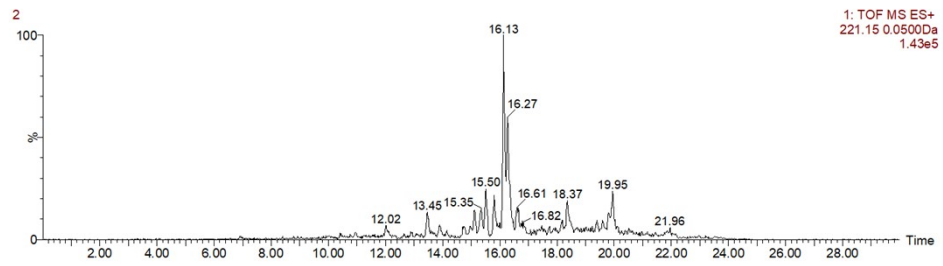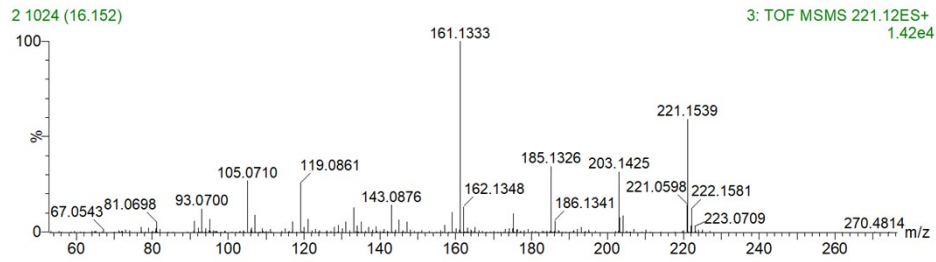

Fig S38 The HPLC-MS/MS spectrum of 3-acetylphenanthren

### (+)-Nootkatone

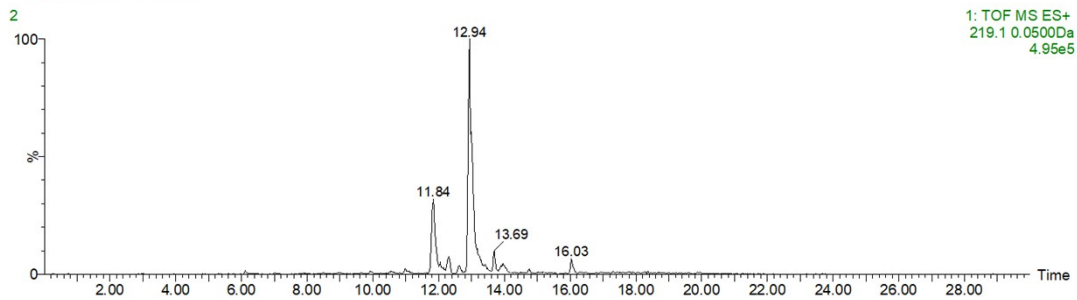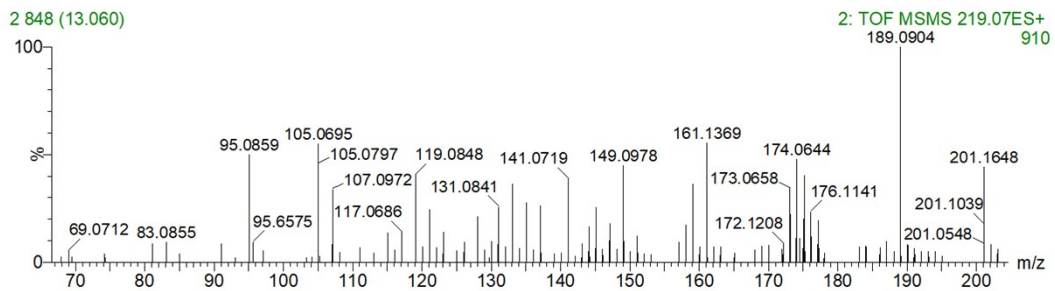

Fig S39 The HPLC-MS/MS spectrum of (+)-nootkatone

### 7 $\alpha$ -hydroxy-3-desoxyzaluzanin C

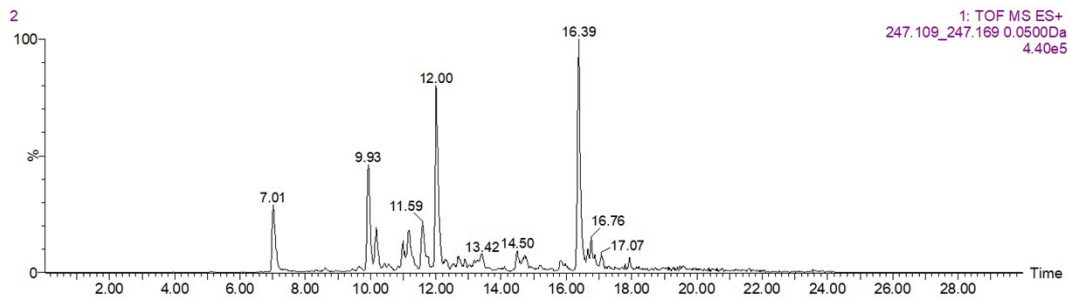

2 786 (12.023)

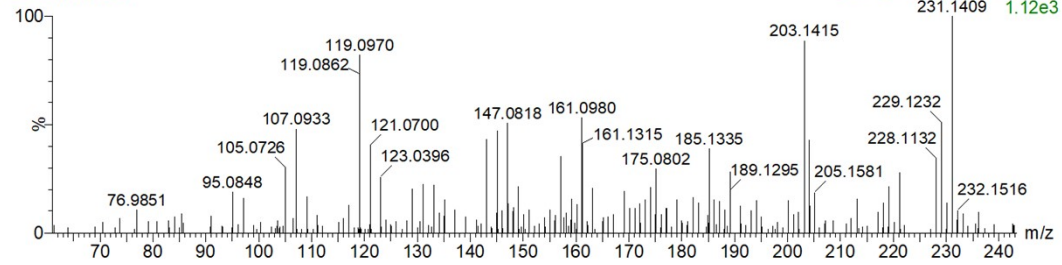

Fig S40 The HPLC-MS/MS spectrum of 7 $\alpha$ -hydroxy-3-desoxyzaluzanin C

### Dehydrocostus lactone

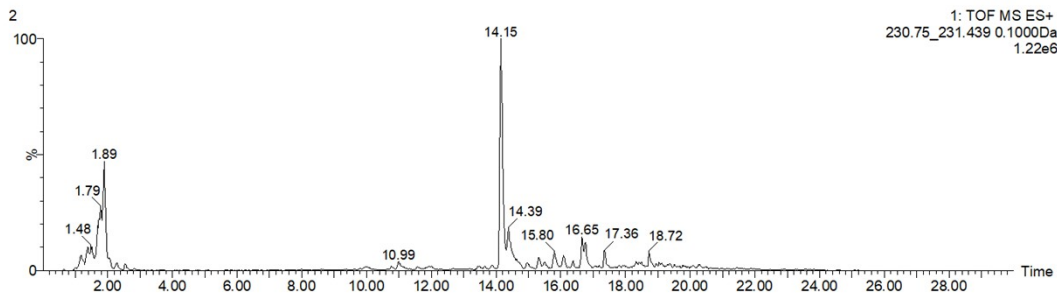

2 914 (14.200)

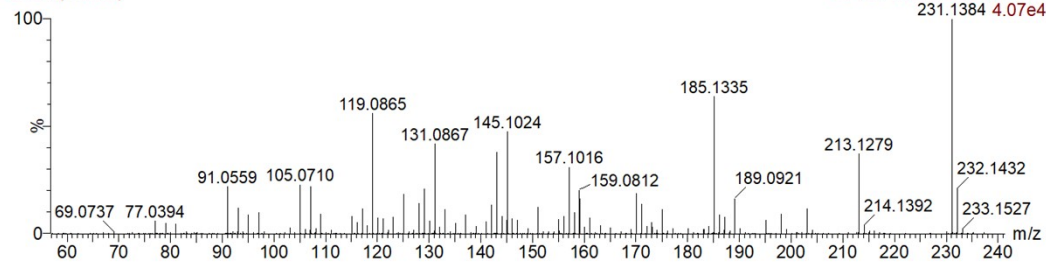

Fig S41 The HPLC-MS/MS spectrum of dehydrocostus lactone

### Costunolide

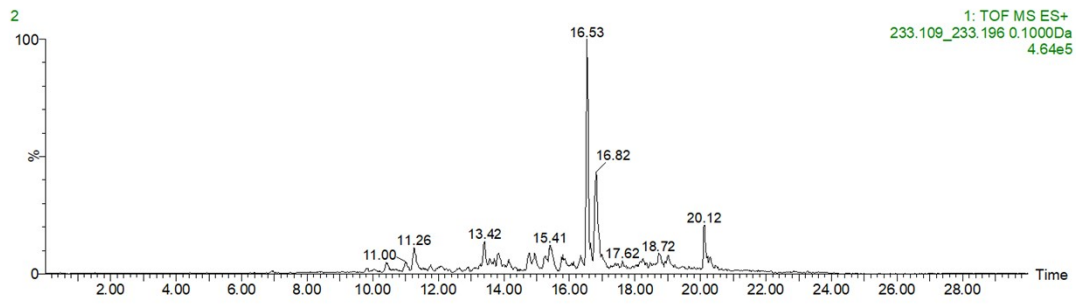

2 1046 (16.556)

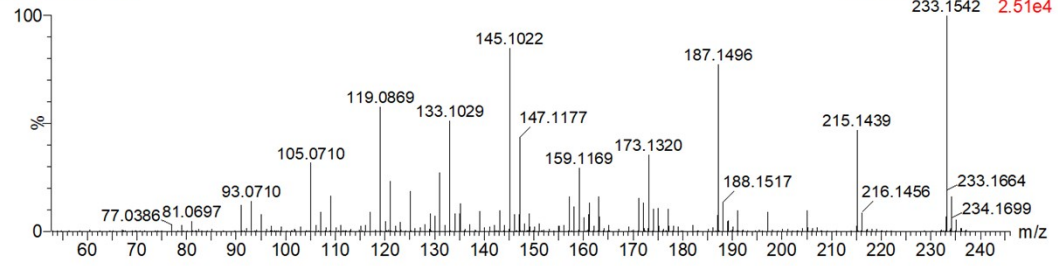

**Fig S42** The HPLC-MS/MS spectrum of costunolide
